# Supplementary material
Source: publisher figshare collection journal article supplement (https://acs.figshare.com/ndownloader/files/5100127)
Supplement: Supplementary file 1 [file 5100127]

# CIF-file generated for LA41/7/1/1 Lange/Wachter
 
#==============================================================================
data_global
#==============================================================================
 
# 0. AUDIT DETAILS
 
_audit_creation_date                 'Jul 02 11:24:30 2004'
_audit_creation_method               'PLATON <TABLE ACC> option'
_audit_update_record
; ?
;
 
#===============================================================================
 
# 1. SUBMISSION DETAILS
 
_publ_contact_author_name           # Name of author for correspondence
; ?
;
_publ_contact_author_address        # address of author for correspondence
; ?
;
 
_publ_contact_author_email           ?
_publ_contact_author_fax             ?
_publ_contact_author_phone           ?
 
_publ_requested_journal              'Acta Crystallographica C'
# Publication choise FI, CI or EI for Inorganic
#                    FM, CM or EM for Metal-organic
#                    FO, CO or EO for Organic
_publ_requested_category             ?
_publ_requested_coeditor_name        ?
 
_publ_contact_letter                # Include date of submission
;
Date of submission ?
 
Please consider this CIF submission for publication as a
Regular Structural Paper in Acta Crystallographica C.
;
 
#===============================================================================
 
# 2. PROCESSING SUMMARY (JOURNAL OFFICE ONLY)
 
_journal_date_recd_electronic        ?
 
_journal_date_to_coeditor            ?
_journal_date_from_coeditor          ?
_journal_date_accepted               ?
 
_journal_date_printers_first         ?
_journal_date_printers_final         ?
_journal_date_proofs_out             ?
_journal_date_proofs_in              ?
 
_journal_coeditor_name               ?
_journal_coeditor_code               ?
_journal_coeditor_notes
; ?
;
 
_journal_techeditor_code             ?
_journal_techeditor_notes
; ?
;
 
_journal_coden_ASTM                  ?
_journal_name_full                   ?
_journal_year                        ?
_journal_volume                      ?
_journal_issue                       ?
_journal_page_first                  ?
_journal_page_last                   ?
 
 
_journal_suppl_publ_number           ?
_journal_suppl_publ_pages            ?
 
 
#===============================================================================
 
# 3. TITLE AND AUTHOR LIST
 
_publ_section_title
; ?
;
_publ_section_title_footnote
; ?
;
 
# The loop structure below should contain the names and adresses of all
# authors, in the required order of publication. Repeat as necessary.
 
 
loop_
_publ_author_name
_publ_author_footnote
_publ_author_address
'?' # author name
; ?  # author related footnote
;
; ?  # Address of this author
;
 
#===============================================================================
 
# 4. TEXT
 
_publ_section_synopsis
;
 ?
;
_publ_section_abstract
;
 ?
;
 
# Insert blank lines between paragraphs
 
_publ_section_comment
; ?
;
_publ_section_exptl_prep
;
 ?
;
_publ_section_exptl_refinement
;
The data were collected at 173K using an Oxford Cryosystems Cooler
(Cosier & Glazer, 1986). The structure was solved by direct methods (SIR-97) 
and refined by full-matrix anisotropic least squares (SHELXL97).  
The H-atoms were calculated geometrically and a riding model was used 
during refinement process.
;
 
# Insert blank lines between references
 
_publ_section_references
;
 Altomare, A., Cascarano, G., Giacovazzo, C. & Guagliardi, A.
   (1993) J. Appl. Cryst. 26, 343-350.

 Cosier, J. & Glazer, A.M. (1986). J. Appl. Cryst. 19, 105-107.

 Flack, H.D. (1983). Acta Cryst. A39, 876-881.

 L. J. Farrugia, J. Appl. Cryst (1997), 30, 565. 

 Sheldrick, G.M. SHELXL97. Program for crystal structure
   refinement. University of G\\"ottingen, Germany, 1997.
 
 Sheldrick, G.M. SHELXS97. Program for Crystal Structure
   solution. University of G\\"ottingen, Germany, 1997.
 
 Sluis, P. v.d., Spek, A.L. (1990). Acta Cryst. A46, 194-201.

 Spek, A.L. (1990). Acta Cryst. A46, C-34.
 
 STOE (1998) IPDS-software, version 2.89, STOE & CIE GmbH, Darmstadt,
   Germany.

 Wilson, A.J.C. (1992) Ed. International Tables for Crystallography,
   Volume C, Kluwer Academic Publishers, Dordrecht, The Netherlands.
;
_publ_section_acknowledgements
; ?
;
_publ_section_figure_captions
; View of the title compound with the atom numbering scheme.
Displacement ellipsoids for non-H atoms are drawn at the 50% probability level.
;
 
#===============================================================================
 
data_d140
 
#===============================================================================
 
# 5. CHEMICAL DATA
 
_chemical_name_systematic
; ?
;
_chemical_name_common                ?
_chemical_melting_point              ?
_chemical_formula_moiety
'2(C40 H60 Rh4 S4.61), 2(C40 H60 Rh4 S5), 2(C7 H8)'
# Ex: 'C12 H16 N2 O6, H2 O' and '(Cd 2+)3, (C6 N6 Cr 3-)2, 2(H2 O)'
_chemical_formula_structural         ?
_chemical_formula_sum
'C174 H256 Rh16 S19.22'
_chemical_formula_iupac              ?
_chemical_formula_weight               4610.74
_chemical_compound_source           'see text'
 
loop_
_atom_type_symbol
_atom_type_description
_atom_type_scat_dispersion_real
_atom_type_scat_dispersion_imag
_atom_type_scat_source
 S   S    0.1246    0.1234
 'International Tables Vol C Tables 4.2.6.8 and 6.1.1.4'
Rh  Rh   -1.1178    0.9187
 'International Tables Vol C Tables 4.2.6.8 and 6.1.1.4'
 H   H    0.0000    0.0000
 'International Tables Vol C Tables 4.2.6.8 and 6.1.1.4'
 C   C    0.0033    0.0016
 'International Tables Vol C Tables 4.2.6.8 and 6.1.1.4'
 
#===============================================================================
 
# 6. CRYSTAL DATA
 
_symmetry_cell_setting                 Monoclinic
_symmetry_space_group_name_Hall      '-P 2yb'
_symmetry_space_group_name_H-M       'P 21/m'
_symmetry_Int_Tables_number                 11
 
loop_
_symmetry_equiv_pos_as_xyz
 x,y,z
 -x,1/2+y,-z
 -x,-y,-z
 x,1/2-y,z
 
_cell_length_a                          11.3831(7)
_cell_length_b                         17.0652(14)
_cell_length_c                         24.2939(16)
_cell_angle_alpha                               90
_cell_angle_beta                        100.017(8)
_cell_angle_gamma                               90
_cell_volume                             4647.3(6)
_cell_formula_units_Z                    1
_cell_measurement_temperature          173
_cell_measurement_reflns_used        ?
_cell_measurement_theta_min          1.82
_cell_measurement_theta_max          25.83
_cell_special_details           
; 
Cell parameters were determined by indexing 8000 reflections with
I/sigma limit 6.0.
;
 
_exptl_crystal_description          'thin plate'
_exptl_crystal_colour               'brown to black'
 
_exptl_crystal_size_max                  0.280
_exptl_crystal_size_mid                  0.120
_exptl_crystal_size_min                  0.030
_exptl_crystal_size_rad              ?
_exptl_crystal_density_meas          ?
_exptl_crystal_density_diffrn            1.648
_exptl_crystal_density_method       'Not Measured'
_exptl_crystal_F_000                      2328
_exptl_absorpt_coefficient_mu            1.640
_exptl_crystal_density_meas_temp     ?
 
# Permitted for  :
# analytical     'analytical from crystal shape'
#                Example: de Meulenaer&Tompa: ABST
# cylinder       'cylindrical'
# gaussian       'Gaussian from crystal shape'
#                Example: PLATON/ABSG
# integration    'integration from crystal shape'
# multi-scan     'symmetry-related measurements'
#                Example: SADABS, MULABS
# none           'no absorption corr. applied'
# numerical      'numerical from crystal shape'
# psi-scan       'psi-scan corrections'
#                Example: PLATON/ABSP
# refdelf        'refined from delta-F'
#                Example: SHELXA, DIFABS, DELABS
# sphere         'spherical'
#                Example: PLATON/ABSS
_exptl_absorpt_correction_type      'analytical'
# Example: '(North, Phillips & Mathews, 1968)'
_exptl_absorpt_process_details
'analytical from crystal shape (X-SHAPE, X-RED. STOE, 1996)'

_exptl_absorpt_correction_T_min   0.6443
_exptl_absorpt_correction_T_max   0.9396
loop_
 _exptl_crystal_face_index_h_
 _exptl_crystal_face_index_k
 _exptl_crystal_face_index_l
 _exptl_crystal_face_perp_dist
     -7    -8    -9    0.0837
      5    -8     9    0.0939
      0     5     4    0.1690
      0     0    -1    0.0212
      0     0     1    0.0153
      1     0    -1    0.0723
    -10     1     2    0.0352
 
#===============================================================================
 
# 7. EXPERIMENTAL DATA
 
_exptl_special_details          
;
Data were collected applying an imaging plate system (STOE) with the
following  measurement parameters:

         Detector distance [mm]                                  70
         Phi movement mode                              Oscillation
         Phi incr. [degrees]                                    1.0
         Number of exposures                                    180
         Irradiation / exposure [min]                         12.00

For a detailed description of the method see: Sheldrick, G.M., Paulus, E.
Vertesy, L. & Hahn, F. (1995) Acta Cryst. B51, 89-98.
;
_diffrn_ambient_temperature          173(1)
_diffrn_radiation_wavelength           0.71073
_diffrn_radiation_type               'Mo K\a'
_diffrn_radiation_source             'fine-focus sealed tube'
_diffrn_radiation_monochromator      'graphite'
 
_diffrn_measurement_device_type      'STOE-IPDS diffractometer'
_diffrn_measurement_method           'rotation'
_diffrn_detector_area_resol_mean     ?
 
_diffrn_standards_number             0
_diffrn_standards_interval_count     0
_diffrn_standards_interval_time      0
_diffrn_standards_decay_%            0

 
loop_
_diffrn_standard_refln_index_h
_diffrn_standard_refln_index_k
_diffrn_standard_refln_index_l
 ? ? ?
 
# number of measured reflections (redundant set)
_diffrn_reflns_number                32582
_diffrn_reflns_av_R_equivalents       0.0497
_diffrn_reflns_av_sigmaI/netI         0.0620
_diffrn_reflns_limit_h_min             -13
_diffrn_reflns_limit_h_max              13
_diffrn_reflns_limit_k_min             -20
_diffrn_reflns_limit_k_max              20
_diffrn_reflns_limit_l_min             -29
_diffrn_reflns_limit_l_max              29
_diffrn_reflns_theta_min              1.82
_diffrn_reflns_theta_max             25.83
_diffrn_reflns_theta_full            25.83
_diffrn_measured_fraction_theta_max  0.977
_diffrn_measured_fraction_theta_full 0.977
_diffrn_reflns_reduction_process
; ?
;
 
# number of unique reflections
_reflns_number_total                    9054
# number of observed reflections (> n sig(I))
_reflns_number_gt                       6215
_reflns_threshold_expression         I>2\s(I)
 
_computing_data_collection           'STOE (1998)'
_computing_cell_refinement           'STOE (1998)'
_computing_data_reduction            'STOE (1998)'
_computing_structure_solution        'SIR-97 (Altomare, 1993)'
_computing_structure_refinement      'SHELXL-97 (Sheldrick, 1997)'
_computing_molecular_graphics        'PLATON (Spek, 1990)'
_computing_publication_material      'PLATON (Spek, 1990)'
 
#===============================================================================
 
# 8. REFINEMENT DATA
 
_refine_special_details
;
 Refinement on F^2 for ALL reflections except those
 flagged by the user for potential systematic errors.
 Weighted R-factors wR and all goodnesses of fit S
 are based on F^2, conventional R-factors R are based
 on F, with F set to zero for negative F^2. The
 observed criterion of F^2 > 2sigma(F^2) is used only
 for calculating -R-factor-obs etc. and is not
 relevant to the choice of reflections for refinement.
 R-factors based on F^2 are statistically about twice
 as large as those based on F, and R-factors based on
 ALL data will be even larger.
;
_refine_ls_structure_factor_coef     Fsqd
_refine_ls_matrix_type               full
_refine_ls_weighting_scheme          'calc'
 
_refine_ls_weighting_details
'calc w=1/[\s^2^(Fo^2^)+(0.0615P)^2^]         where P=(Fo^2^+2Fc^2^)/3'
_atom_sites_solution_primary        'direct'
_atom_sites_solution_secondary      'difmap'
_atom_sites_solution_hydrogens      'geom'
 
 
# Permitted for _refine_ls_hydrogen_treatment :
# refall  - refined all H parameters
# refxyz  - refined H coordinates only
# refU    - refined H U only
# noref   - no refinement of H parameters
# constr  - H parameters constrained
# mixed   - some constrained, some independent
# undef   - H-atom parameters not defined
_refine_ls_hydrogen_treatment       'constr'
 
_refine_ls_extinction_method         'none'
_refine_ls_abs_structure_details     ?
_refine_ls_abs_structure_Flack      .
_refine_ls_number_reflns                  9054
_refine_ls_number_parameters               542
_refine_ls_number_restraints                 0
_refine_ls_number_constraints        ?
_refine_ls_R_factor_all                 0.0722
_refine_ls_R_factor_gt                  0.0449
_refine_ls_wR_factor_ref                0.1054
_refine_ls_wR_factor_gt                 0.0980
_refine_ls_goodness_of_fit_ref           0.924
_refine_ls_restrained_S_all              0.924
_refine_ls_shift/su_max                  0.001
_refine_ls_shift/su_mean                 0.000
_refine_diff_density_max                 1.705
_refine_diff_density_min                -1.004
_refine_diff_density_rms                 0.132
 
#===============================================================================
 
# 9. ATOMIC COORDINATES AND DISPLACEMENT PARAMETERS
 
loop_
_atom_site_label
_atom_site_type_symbol
_atom_site_thermal_displace_type
_atom_site_fract_x
_atom_site_fract_y
_atom_site_fract_z
_atom_site_occupancy
_atom_site_U_iso_or_equiv
_atom_site_calc_flag
_atom_site_refinement_flags
Rh4 Rh Uani 0.75683(4) 0.14305(2) 0.91173(2) 1.000 0.0307(1) . .
Rh5 Rh Uani 0.73221(6) 0.25000 0.78535(3) 1.000 0.0261(2) . .
Rh6 Rh Uani 0.47049(6) 0.25000 0.84942(3) 1.000 0.0330(2) . .
S5 S Uani 0.8527(2) 0.25000 0.87481(10) 1.000 0.0346(7) . .
S6 S Uani 0.61607(13) 0.16083(8) 0.82861(7) 1.000 0.0332(5) . .
C23 C Uani 0.8870(7) 0.0884(4) 0.9776(3) 1.000 0.045(2) . .
C24 C Uani 0.7673(7) 0.0642(4) 0.9844(3) 1.000 0.046(2) . .
C25 C Uani 0.7185(6) 0.0226(4) 0.9360(3) 1.000 0.043(2) . .
C26 C Uani 0.8046(6) 0.0183(3) 0.8999(3) 1.000 0.040(2) . .
C27 C Uani 0.9070(6) 0.0577(3) 0.9261(3) 1.000 0.040(2) . .
C28 C Uani 0.9757(10) 0.1313(5) 1.0207(4) 1.000 0.085(4) . .
C29 C Uani 0.7082(12) 0.0815(6) 1.0344(4) 1.000 0.093(5) . .
C30 C Uani 0.5967(8) -0.0159(5) 0.9236(6) 1.000 0.090(4) . .
C31 C Uani 0.7906(9) -0.0250(5) 0.8448(4) 1.000 0.070(3) . .
C32 C Uani 1.0234(7) 0.0672(5) 0.9046(4) 1.000 0.069(3) . .
C33 C Uani 0.8631(6) 0.2077(3) 0.7339(3) 1.000 0.040(2) . .
C34 C Uani 0.7488(7) 0.1836(4) 0.7082(3) 1.000 0.046(2) . .
C35 C Uani 0.6758(9) 0.25000 0.6927(4) 1.000 0.048(4) . .
C36 C Uani 0.9713(9) 0.1579(5) 0.7546(4) 1.000 0.071(3) . .
C37 C Uani 0.7077(11) 0.0983(5) 0.6980(4) 1.000 0.086(4) . .
C38 C Uani 0.5509(12) 0.25000 0.6594(5) 1.000 0.092(6) . .
C39 C Uani 0.3142(7) 0.2114(5) 0.7809(4) 1.000 0.061(3) . .
C40 C Uani 0.3020(6) 0.1822(3) 0.8350(3) 1.000 0.038(2) . .
C41 C Uani 0.2868(12) 0.25000 0.8685(6) 1.000 0.081(6) . .
C42 C Uani 0.3248(10) 0.1548(6) 0.7325(5) 1.000 0.090(4) . .
C43 C Uani 0.2909(9) 0.0963(5) 0.8442(6) 1.000 0.099(5) . .
C44 C Uani 0.2493(18) 0.25000 0.9233(8) 1.000 0.112(8) . .
S7 S Uani 0.7022(10) 0.25000 0.9596(4) 0.46(4) 0.023(2) . .
S8 S Uani 0.5196(4) 0.25000 0.94510(18) 0.46(2) 0.0281(17) . .
S9 S Uani 0.6352(14) 0.25000 0.9349(6) 0.31(4) 0.020(4) . .
S10 S Uani 0.5692(13) 0.3034(7) 0.9282(6) 0.105(8) 0.026(5) . .
S11 S Uani 0.6309(15) 0.2948(9) 0.9709(6) 0.088(8) 0.025(6) . .
Rh1 Rh Uani 0.23289(4) 0.85586(2) 0.67331(2) 1.000 0.0267(1) . .
Rh2 Rh Uani 0.01250(6) 0.75000 0.58273(3) 1.000 0.0274(2) . .
Rh3 Rh Uani 0.29581(6) 0.75000 0.53729(3) 1.000 0.0300(2) . .
S1 S Uani 0.0999(2) 0.75000 0.67798(8) 1.000 0.0288(6) . .
S2 S Uani 0.3629(2) 0.75000 0.68338(9) 1.000 0.0347(7) . .
S3 S Uani 0.17145(14) 0.83816(8) 0.57615(6) 1.000 0.0295(4) . .
S4 S Uani 0.4484(2) 0.75000 0.61532(10) 1.000 0.0414(8) . .
C1 C Uani 0.2967(6) 0.9782(3) 0.6709(3) 1.000 0.0356(19) . .
C2 C Uani 0.1722(6) 0.9795(3) 0.6774(3) 1.000 0.0346(19) . .
C3 C Uani 0.1627(6) 0.9420(3) 0.7282(3) 1.000 0.038(2) . .
C4 C Uani 0.2802(6) 0.9163(3) 0.7544(2) 1.000 0.0354(19) . .
C5 C Uani 0.3631(6) 0.9407(3) 0.7192(3) 1.000 0.0358(19) . .
C6 C Uani 0.3468(8) 1.0136(4) 0.6224(3) 1.000 0.053(3) . .
C7 C Uani 0.0736(7) 1.0185(4) 0.6367(3) 1.000 0.051(3) . .
C8 C Uani 0.0523(7) 0.9315(4) 0.7536(3) 1.000 0.055(3) . .
C9 C Uani 0.3118(8) 0.8784(4) 0.8112(3) 1.000 0.053(3) . .
C10 C Uani 0.4964(7) 0.9294(4) 0.7301(3) 1.000 0.056(3) . .
C11 C Uani 0.4368(9) 0.75000 0.4853(4) 1.000 0.053(4) . .
C12 C Uani 0.3635(7) 0.8184(4) 0.4725(3) 1.000 0.045(2) . .
C13 C Uani 0.2483(6) 0.7909(4) 0.4487(3) 1.000 0.040(2) . .
C14 C Uani 0.5692(11) 0.75000 0.5049(7) 1.000 0.110(8) . .
C15 C Uani 0.4053(11) 0.9014(6) 0.4777(4) 1.000 0.092(5) . .
C16 C Uani 0.1446(8) 0.8442(5) 0.4260(3) 1.000 0.064(3) . .
C17 C Uani -0.1670(6) 0.7928(4) 0.5925(3) 1.000 0.040(2) . .
C18 C Uani -0.1466(6) 0.8176(4) 0.5396(3) 1.000 0.043(2) . .
C19 C Uani -0.1327(8) 0.75000 0.5061(4) 1.000 0.041(3) . .
C20 C Uani -0.1967(7) 0.8434(5) 0.6391(3) 1.000 0.054(3) . .
C21 C Uani -0.1445(7) 0.9013(5) 0.5189(4) 1.000 0.058(3) . .
C22 C Uani -0.1402(10) 0.75000 0.4438(5) 1.000 0.060(4) . .
C45 C Uani 0.6662(17) 0.75000 0.8724(5) 1.000 0.078(6) . .
C46 C Uani 0.6297(12) 0.75000 0.8151(5) 1.000 0.057(4) . .
C47 C Uani 0.7093(13) 0.75000 0.7795(6) 1.000 0.066(5) . .
C48 C Uani 0.8314(14) 0.75000 0.7988(7) 1.000 0.077(6) . .
C49 C Uani 0.8703(17) 0.75000 0.8563(8) 1.000 0.094(7) . .
C50 C Uani 0.7858(16) 0.75000 0.8928(6) 1.000 0.079(6) . .
C51 C Uani 0.5709(18) 0.75000 0.9091(7) 1.000 0.100(7) . .
H28A H Uiso 0.93290 0.16640 1.04230 1.000 0.1010 calc R
H28B H Uiso 1.02970 0.16200 1.00180 1.000 0.1010 calc R
H28C H Uiso 1.02190 0.09330 1.04590 1.000 0.1010 calc R
H29A H Uiso 0.62200 0.08740 1.02200 1.000 0.1120 calc R
H29B H Uiso 0.74090 0.13010 1.05230 1.000 0.1120 calc R
H29C H Uiso 0.72340 0.03820 1.06120 1.000 0.1120 calc R
H30A H Uiso 0.56930 -0.01770 0.88310 1.000 0.1080 calc R
H30B H Uiso 0.54000 0.01460 0.94110 1.000 0.1080 calc R
H30C H Uiso 0.60200 -0.06930 0.93870 1.000 0.1080 calc R
H31A H Uiso 0.83780 0.00120 0.82010 1.000 0.0840 calc R
H31B H Uiso 0.70630 -0.02520 0.82720 1.000 0.0840 calc R
H31C H Uiso 0.81850 -0.07910 0.85140 1.000 0.0840 calc R
H32A H Uiso 1.00720 0.07030 0.86370 1.000 0.0830 calc R
H32B H Uiso 1.06340 0.11520 0.91990 1.000 0.0830 calc R
H32C H Uiso 1.07500 0.02200 0.91620 1.000 0.0830 calc R
H36A H Uiso 0.94600 0.10840 0.76940 1.000 0.0840 calc R
H36B H Uiso 1.02430 0.18590 0.78430 1.000 0.0840 calc R
H36C H Uiso 1.01370 0.14710 0.72370 1.000 0.0840 calc R
H37A H Uiso 0.62220 0.09460 0.69910 1.000 0.1030 calc R
H37B H Uiso 0.75220 0.06470 0.72710 1.000 0.1030 calc R
H37C H Uiso 0.72230 0.08120 0.66130 1.000 0.1030 calc R
H38A H Uiso 0.50850 0.20310 0.66860 0.500 0.1100 calc R
H38B H Uiso 0.50850 0.29690 0.66860 0.500 0.1100 calc R
H38C H Uiso 0.55460 0.25000 0.61940 1.000 0.1100 calc R
H42A H Uiso 0.35400 0.10390 0.74780 1.000 0.1080 calc R
H42B H Uiso 0.38080 0.17640 0.71010 1.000 0.1080 calc R
H42C H Uiso 0.24640 0.14820 0.70900 1.000 0.1080 calc R
H43A H Uiso 0.32000 0.08410 0.88370 1.000 0.1180 calc R
H43B H Uiso 0.33850 0.06770 0.82090 1.000 0.1180 calc R
H43C H Uiso 0.20710 0.08070 0.83430 1.000 0.1180 calc R
H44A H Uiso 0.28030 0.29690 0.94410 0.500 0.1340 calc R
H44B H Uiso 0.28050 0.20320 0.94420 0.500 0.1340 calc R
H44C H Uiso 0.16200 0.25000 0.91820 1.000 0.1340 calc R
H6A H Uiso 0.28600 1.01160 0.58840 1.000 0.0630 calc R
H6B H Uiso 0.41710 0.98370 0.61640 1.000 0.0630 calc R
H6C H Uiso 0.36950 1.06820 0.63100 1.000 0.0630 calc R
H7A H Uiso -0.00160 0.99070 0.63690 1.000 0.0610 calc R
H7B H Uiso 0.09330 1.01690 0.59900 1.000 0.0610 calc R
H7C H Uiso 0.06540 1.07320 0.64790 1.000 0.0610 calc R
H8A H Uiso 0.06140 0.88510 0.77780 1.000 0.0660 calc R
H8B H Uiso -0.01690 0.92460 0.72380 1.000 0.0660 calc R
H8C H Uiso 0.04050 0.97780 0.77580 1.000 0.0660 calc R
H9A H Uiso 0.38180 0.84470 0.81200 1.000 0.0640 calc R
H9B H Uiso 0.24430 0.84680 0.81860 1.000 0.0640 calc R
H9C H Uiso 0.32970 0.91910 0.83990 1.000 0.0640 calc R
H10A H Uiso 0.52490 0.92480 0.69440 1.000 0.0670 calc R
H10B H Uiso 0.51630 0.88150 0.75200 1.000 0.0670 calc R
H10C H Uiso 0.53460 0.97440 0.75090 1.000 0.0670 calc R
H14A H Uiso 0.59210 0.70320 0.52760 0.500 0.1320 calc R
H14B H Uiso 0.59210 0.79690 0.52750 0.500 0.1320 calc R
H14C H Uiso 0.60980 0.75000 0.47250 1.000 0.1320 calc R
H15A H Uiso 0.47220 0.90590 0.50890 1.000 0.1100 calc R
H15B H Uiso 0.33990 0.93530 0.48450 1.000 0.1100 calc R
H15C H Uiso 0.43140 0.91740 0.44300 1.000 0.1100 calc R
H16A H Uiso 0.06970 0.81960 0.43150 1.000 0.0770 calc R
H16B H Uiso 0.15420 0.89450 0.44580 1.000 0.0770 calc R
H16C H Uiso 0.14290 0.85320 0.38600 1.000 0.0770 calc R
H20A H Uiso -0.15330 0.89310 0.63990 1.000 0.0650 calc R
H20B H Uiso -0.17350 0.81630 0.67490 1.000 0.0650 calc R
H20C H Uiso -0.28270 0.85380 0.63270 1.000 0.0650 calc R
H21A H Uiso -0.09180 0.90480 0.49110 1.000 0.0690 calc R
H21B H Uiso -0.11510 0.93600 0.55040 1.000 0.0690 calc R
H21C H Uiso -0.22540 0.91710 0.50180 1.000 0.0690 calc R
H22A H Uiso -0.10030 0.70330 0.43260 0.500 0.0720 calc R
H22B H Uiso -0.10110 0.79700 0.43250 0.500 0.0720 calc R
H22C H Uiso -0.22410 0.75000 0.42570 1.000 0.0720 calc R
H46 H Uiso 0.54680 0.75000 0.80030 1.000 0.0690 calc R
H47 H Uiso 0.68070 0.75000 0.74040 1.000 0.0800 calc R
H48 H Uiso 0.88650 0.75000 0.77360 1.000 0.0920 calc R
H49 H Uiso 0.95320 0.75000 0.87110 1.000 0.1130 calc R
H50 H Uiso 0.81280 0.75000 0.93200 1.000 0.0950 calc R
H51A H Uiso 0.52100 0.70320 0.90120 0.500 0.1200 calc R
H51B H Uiso 0.52120 0.79700 0.90130 0.500 0.1200 calc R
H51C H Uiso 0.60900 0.75000 0.94850 1.000 0.1200 calc R
 
loop_
_atom_site_aniso_label
_atom_site_aniso_U_11
_atom_site_aniso_U_22
_atom_site_aniso_U_33
_atom_site_aniso_U_23
_atom_site_aniso_U_13
_atom_site_aniso_U_12
Rh4 0.0379(3) 0.0240(2) 0.0314(2) 0.0031(2) 0.0092(2) 0.0082(2)
Rh5 0.0289(4) 0.0235(3) 0.0263(3) 0.0000 0.0063(3) 0.0000
Rh6 0.0337(4) 0.0296(3) 0.0379(4) 0.0000 0.0124(3) 0.0000
S5 0.0353(13) 0.0220(9) 0.0425(12) 0.0000 -0.0047(10) 0.0000
S6 0.0237(8) 0.0248(7) 0.0496(9) 0.0051(6) 0.0023(7) -0.0008(5)
C23 0.054(5) 0.029(3) 0.045(4) 0.010(3) -0.012(4) 0.001(3)
C24 0.063(5) 0.039(3) 0.037(4) 0.014(3) 0.016(4) 0.009(3)
C25 0.035(4) 0.033(3) 0.060(5) 0.017(3) 0.006(3) 0.002(3)
C26 0.049(4) 0.025(3) 0.043(4) 0.005(3) -0.001(3) 0.015(3)
C27 0.035(4) 0.027(3) 0.058(4) 0.013(3) 0.007(3) 0.011(3)
C28 0.108(9) 0.047(5) 0.079(6) 0.001(4) -0.039(6) -0.008(5)
C29 0.134(10) 0.089(7) 0.069(6) 0.026(5) 0.051(7) 0.022(7)
C30 0.046(5) 0.063(6) 0.156(11) 0.029(6) 0.004(6) -0.010(4)
C31 0.092(7) 0.048(4) 0.065(5) -0.008(4) -0.003(5) 0.018(4)
C32 0.043(5) 0.060(5) 0.108(7) 0.023(5) 0.024(5) 0.010(4)
C33 0.052(5) 0.034(3) 0.039(4) 0.005(3) 0.023(3) 0.007(3)
C34 0.065(5) 0.047(4) 0.032(3) -0.007(3) 0.026(4) -0.015(3)
C35 0.035(6) 0.084(8) 0.027(5) 0.0000 0.010(4) 0.0000
C36 0.077(6) 0.073(6) 0.069(6) 0.011(4) 0.034(5) 0.035(5)
C37 0.139(10) 0.067(5) 0.065(6) -0.035(5) 0.054(6) -0.047(6)
C38 0.060(9) 0.180(16) 0.036(6) 0.0000 0.012(7) 0.0000
C39 0.026(4) 0.067(5) 0.089(6) 0.009(4) 0.007(4) -0.013(3)
C40 0.031(4) 0.029(3) 0.056(4) 0.001(3) 0.013(3) 0.001(2)
C41 0.057(8) 0.115(11) 0.087(10) 0.0000 0.056(8) 0.0000
C42 0.082(8) 0.094(7) 0.092(8) -0.034(6) 0.010(6) -0.013(6)
C43 0.057(6) 0.044(5) 0.187(13) 0.009(6) 0.000(7) -0.007(4)
C44 0.137(16) 0.106(13) 0.111(14) 0.0000 0.073(13) 0.0000
S7 0.023(6) 0.021(2) 0.025(4) 0.0000 0.008(4) 0.0000
S8 0.026(3) 0.034(3) 0.027(3) 0.0000 0.012(2) 0.0000
S9 0.021(8) 0.015(4) 0.026(6) 0.0000 0.009(6) 0.0000
S10 0.026(9) 0.022(8) 0.030(9) -0.003(5) 0.007(7) -0.009(6)
S11 0.021(11) 0.039(11) 0.014(10) -0.004(7) -0.002(7) -0.007(7)
Rh1 0.0286(3) 0.0237(2) 0.0267(2) -0.0045(2) 0.0014(2) 0.0008(2)
Rh2 0.0215(3) 0.0304(3) 0.0281(3) 0.0000 -0.0020(3) 0.0000
Rh3 0.0307(4) 0.0394(4) 0.0195(3) 0.0000 0.0035(3) 0.0000
S1 0.0395(13) 0.0237(9) 0.0235(10) 0.0000 0.0064(9) 0.0000
S2 0.0349(13) 0.0374(11) 0.0307(11) 0.0000 0.0026(10) 0.0000
S3 0.0358(9) 0.0292(7) 0.0244(7) 0.0009(5) 0.0079(7) -0.0027(6)
S4 0.0286(13) 0.0599(14) 0.0354(12) 0.0000 0.0049(11) 0.0000
C1 0.044(4) 0.027(3) 0.035(3) -0.002(2) 0.005(3) -0.007(3)
C2 0.043(4) 0.024(3) 0.034(3) -0.005(2) -0.001(3) 0.003(2)
C3 0.051(4) 0.025(3) 0.040(4) -0.012(3) 0.012(3) 0.000(3)
C4 0.054(4) 0.021(3) 0.028(3) -0.008(2) -0.002(3) -0.004(3)
C5 0.043(4) 0.028(3) 0.033(3) 0.000(2) -0.003(3) -0.007(3)
C6 0.064(5) 0.048(4) 0.047(4) 0.009(3) 0.012(4) -0.011(4)
C7 0.056(5) 0.040(4) 0.051(4) 0.002(3) -0.006(4) 0.010(3)
C8 0.063(5) 0.042(4) 0.066(5) -0.016(3) 0.026(4) -0.002(3)
C9 0.087(6) 0.037(4) 0.033(4) 0.000(3) 0.003(4) -0.001(4)
C10 0.049(5) 0.050(4) 0.060(5) 0.005(4) -0.012(4) -0.014(3)
C11 0.027(6) 0.096(9) 0.035(5) 0.0000 0.005(5) 0.0000
C12 0.048(5) 0.064(4) 0.027(3) 0.002(3) 0.018(3) -0.013(3)
C13 0.033(4) 0.064(4) 0.025(3) 0.006(3) 0.011(3) 0.009(3)
C14 0.021(7) 0.23(2) 0.076(10) 0.0000 0.003(7) 0.0000
C15 0.135(10) 0.086(7) 0.061(6) 0.000(5) 0.035(6) -0.047(7)
C16 0.061(5) 0.091(6) 0.043(4) 0.022(4) 0.016(4) 0.031(5)
C17 0.020(4) 0.059(4) 0.039(4) -0.008(3) -0.002(3) 0.003(3)
C18 0.022(4) 0.057(4) 0.046(4) 0.016(3) -0.006(3) 0.008(3)
C19 0.016(5) 0.069(6) 0.034(5) 0.0000 -0.006(4) 0.0000
C20 0.038(4) 0.071(5) 0.053(4) -0.005(4) 0.011(4) 0.005(3)
C21 0.045(5) 0.065(5) 0.061(5) 0.018(4) 0.002(4) 0.008(4)
C22 0.029(6) 0.105(9) 0.043(6) 0.0000 -0.002(5) 0.0000
C45 0.145(15) 0.033(6) 0.050(7) 0.0000 0.000(9) 0.0000
C46 0.076(9) 0.045(6) 0.044(6) 0.0000 -0.009(6) 0.0000
C47 0.076(10) 0.054(7) 0.062(8) 0.0000 -0.008(7) 0.0000
C48 0.077(10) 0.061(8) 0.088(11) 0.0000 0.002(9) 0.0000
C49 0.089(12) 0.056(8) 0.118(14) 0.0000 -0.034(11) 0.0000
C50 0.095(12) 0.053(7) 0.068(9) 0.0000 -0.047(9) 0.0000
C51 0.168(18) 0.059(8) 0.077(10) 0.0000 0.036(11) 0.0000
 
 
_geom_special_details
;
 Bond distances, angles etc. have been calculated using the
 rounded fractional coordinates. All su's are estimated
 from the variances of the (full) variance-covariance matrix.
 The cell esds are taken into account in the estimation of
 distances, angles and torsion angles
;
 
loop_
_geom_bond_atom_site_label_1
_geom_bond_atom_site_label_2
_geom_bond_distance
_geom_bond_site_symmetry_1
_geom_bond_site_symmetry_2
_geom_bond_publ_flag
 Rh4     S5       2.3806(16)                     .       .                   yes
 Rh4     S6       2.3688(17)                     .       .                   yes
 Rh4     C23        2.191(7)                     .       .                   yes
 Rh4     C24        2.206(7)                     .       .                   yes
 Rh4     C25        2.203(7)                     .       .                   yes
 Rh4     C26        2.228(5)                     .       .                   yes
 Rh4     C27        2.227(6)                     .       .                   yes
 Rh4     S7         2.307(6)                     .       .                   yes
 Rh4     S9        2.416(10)                     .       .                   yes
 Rh4     S10       2.420(15)                     .     4_555                 yes
 Rh4     S11       2.442(16)                     .     4_555                 yes
 Rh5     S5         2.360(2)                     .       .                   yes
 Rh5     S6       2.3772(16)                     .       .                   yes
 Rh5     C33        2.225(7)                     .       .                   yes
 Rh5     C34        2.226(7)                     .       .                   yes
 Rh5     C35       2.231(10)                     .       .                   yes
 Rh5     S6       2.3772(16)                     .     4_555                 yes
 Rh5     C33        2.225(7)                     .     4_555                 yes
 Rh5     C34        2.226(7)                     .     4_555                 yes
 Rh6     S6       2.3683(16)                     .       .                   yes
 Rh6     C39        2.311(9)                     .       .                   yes
 Rh6     C40        2.215(7)                     .       .                   yes
 Rh6     C41       2.219(14)                     .       .                   yes
 Rh6     S8         2.294(4)                     .       .                   yes
 Rh6     S9        2.544(15)                     .       .                   yes
 Rh6     S10       2.238(14)                     .       .                   yes
 Rh6     S6       2.3683(16)                     .     4_555                 yes
 Rh6     C39        2.311(9)                     .     4_555                 yes
 Rh6     C40        2.215(7)                     .     4_555                 yes
 Rh6     S10       2.238(14)                     .     4_555                 yes
 Rh1     C4         2.206(5)                     .       .                   yes
 Rh1     C5         2.227(6)                     .       .                   yes
 Rh1     C3         2.225(6)                     .       .                   yes
 Rh1     S3       2.3616(15)                     .       .                   yes
 Rh1     S1       2.3723(16)                     .       .                   yes
 Rh1     S2       2.3211(15)                     .       .                   yes
 Rh1     C1         2.215(5)                     .       .                   yes
 Rh1     C2         2.228(5)                     .       .                   yes
 Rh2     S3       2.3798(16)                     .       .                   yes
 Rh2     S1         2.355(2)                     .       .                   yes
 Rh2     C19        2.264(9)                     .       .                   yes
 Rh2     C17        2.221(7)                     .       .                   yes
 Rh2     C18        2.247(7)                     .       .                   yes
 Rh2     C18        2.247(7)                     .     4_565                 yes
 Rh2     S3       2.3798(16)                     .     4_565                 yes
 Rh2     C17        2.221(7)                     .     4_565                 yes
 Rh3     S3       2.3714(16)                     .       .                   yes
 Rh3     C13        2.238(7)                     .     4_565                 yes
 Rh3     C12        2.204(7)                     .       .                   yes
 Rh3     S4         2.338(2)                     .       .                   yes
 Rh3     C11       2.208(10)                     .       .                   yes
 Rh3     C12        2.204(7)                     .     4_565                 yes
 Rh3     C13        2.238(7)                     .       .                   yes
 Rh3     S3       2.3714(16)                     .     4_565                 yes
 S10     S10       1.823(17)                     .     4_555                 yes
 S11     S11         1.53(2)                     .     4_555                 yes
 S2      S4         2.059(3)                     .       .                   yes
 C23     C24       1.460(11)                     .       .                   no
 C23     C28       1.511(12)                     .       .                   no
 C23     C27       1.411(10)                     .       .                   no
 C24     C29       1.516(13)                     .       .                   no
 C24     C25       1.403(10)                     .       .                   no
 C25     C30       1.516(12)                     .       .                   no
 C25     C26       1.426(10)                     .       .                   no
 C26     C31       1.513(12)                     .       .                   no
 C26     C27        1.399(9)                     .       .                   no
 C27     C32       1.515(11)                     .       .                   no
 C33     C36       1.509(12)                     .       .                   no
 C33     C34       1.403(10)                     .       .                   no
 C33     C33        1.444(7)                     .     4_555                 no
 C34     C37       1.536(11)                     .       .                   no
 C34     C35        1.417(9)                     .       .                   no
 C35     C38       1.509(17)                     .       .                   no
 C39     C39       1.317(12)                     .     4_555                 no
 C39     C42       1.543(15)                     .       .                   no
 C39     C40       1.435(12)                     .       .                   no
 C40     C41       1.442(10)                     .       .                   no
 C40     C43       1.492(10)                     .       .                   no
 C41     C44         1.47(2)                     .       .                   no
 C28     H28A         0.9800                     .       .                   no
 C28     H28B         0.9805                     .       .                   no
 C28     H28C         0.9797                     .       .                   no
 C29     H29B         0.9794                     .       .                   no
 C29     H29C         0.9801                     .       .                   no
 C29     H29A         0.9802                     .       .                   no
 C30     H30B         0.9817                     .       .                   no
 C30     H30C         0.9803                     .       .                   no
 C30     H30A         0.9796                     .       .                   no
 C31     H31C         0.9804                     .       .                   no
 C31     H31B         0.9803                     .       .                   no
 C31     H31A         0.9802                     .       .                   no
 C32     H32B         0.9786                     .       .                   no
 C32     H32A         0.9800                     .       .                   no
 C32     H32C         0.9807                     .       .                   no
 C36     H36B         0.9805                     .       .                   no
 C36     H36A         0.9807                     .       .                   no
 C36     H36C         0.9780                     .       .                   no
 C37     H37B         0.9801                     .       .                   no
 C37     H37C         0.9794                     .       .                   no
 C37     H37A         0.9803                     .       .                   no
 C38     H38B         0.9803                     .       .                   no
 C38     H38C         0.9800                     .       .                   no
 C38     H38A         0.9803                     .       .                   no
 C42     H42C         0.9787                     .       .                   no
 C42     H42B         0.9793                     .       .                   no
 C42     H42A         0.9799                     .       .                   no
 C43     H43C         0.9792                     .       .                   no
 C43     H43B         0.9792                     .       .                   no
 C43     H43A         0.9815                     .       .                   no
 C44     H44A         0.9790                     .       .                   no
 C44     H44B         0.9793                     .       .                   no
 C44     H44C         0.9798                     .       .                   no
 C1      C2        1.453(10)                     .       .                   no
 C1      C5        1.432(10)                     .       .                   no
 C1      C6        1.521(10)                     .       .                   no
 C2      C3        1.411(10)                     .       .                   no
 C2      C7        1.515(10)                     .       .                   no
 C3      C4         1.446(9)                     .       .                   no
 C3      C8        1.504(11)                     .       .                   no
 C4      C5         1.441(9)                     .       .                   no
 C4      C9         1.510(9)                     .       .                   no
 C5      C10       1.507(11)                     .       .                   no
 C11     C12        1.437(9)                     .       .                   no
 C11     C14       1.500(17)                     .       .                   no
 C11     C12        1.437(9)                     .     4_565                 no
 C12     C13       1.418(10)                     .       .                   no
 C12     C15       1.493(13)                     .       .                   no
 C13     C16       1.516(11)                     .       .                   no
 C13     C13       1.396(10)                     .     4_565                 no
 C17     C18       1.410(10)                     .       .                   no
 C17     C20       1.508(10)                     .       .                   no
 C17     C17       1.461(10)                     .     4_565                 no
 C18     C19        1.436(9)                     .       .                   no
 C18     C21       1.516(11)                     .       .                   no
 C19     C22       1.501(15)                     .       .                   no
 C6      H6A          0.9816                     .       .                   no
 C6      H6B          0.9811                     .       .                   no
 C6      H6C          0.9797                     .       .                   no
 C7      H7A          0.9794                     .       .                   no
 C7      H7B          0.9805                     .       .                   no
 C7      H7C          0.9813                     .       .                   no
 C8      H8A          0.9809                     .       .                   no
 C8      H8B          0.9798                     .       .                   no
 C8      H8C          0.9790                     .       .                   no
 C9      H9A          0.9801                     .       .                   no
 C9      H9B          0.9806                     .       .                   no
 C9      H9C          0.9801                     .       .                   no
 C10     H10A         0.9806                     .       .                   no
 C10     H10B         0.9801                     .       .                   no
 C10     H10C         0.9786                     .       .                   no
 C14     H14A         0.9797                     .       .                   no
 C14     H14B         0.9799                     .       .                   no
 C14     H14C         0.9796                     .       .                   no
 C15     H15A         0.9796                     .       .                   no
 C15     H15B         0.9793                     .       .                   no
 C15     H15C         0.9801                     .       .                   no
 C16     H16A         0.9801                     .       .                   no
 C16     H16B         0.9807                     .       .                   no
 C16     H16C         0.9807                     .       .                   no
 C20     H20A         0.9800                     .       .                   no
 C20     H20B         0.9799                     .       .                   no
 C20     H20C         0.9803                     .       .                   no
 C21     H21A         0.9801                     .       .                   no
 C21     H21B         0.9794                     .       .                   no
 C21     H21C         0.9799                     .       .                   no
 C22     H22A         0.9790                     .       .                   no
 C22     H22B         0.9794                     .       .                   no
 C22     H22C         0.9795                     .       .                   no
 C22     H22A         0.9790                     .     4_565                 no
 C22     H22B         0.9794                     .     4_565                 no
 C45     C46       1.382(17)                     .       .                   no
 C45     C50         1.37(3)                     .       .                   no
 C45     C51         1.52(3)                     .       .                   no
 C46     C47         1.36(2)                     .       .                   no
 C47     C48         1.39(2)                     .       .                   no
 C48     C49         1.39(3)                     .       .                   no
 C49     C50         1.42(3)                     .       .                   no
 C46     H46          0.9496                     .       .                   no
 C47     H47          0.9491                     .       .                   no
 C48     H48          0.9496                     .       .                   no
 C49     H49          0.9496                     .       .                   no
 C50     H50          0.9484                     .       .                   no
 C51     H51A         0.9795                     .       .                   no
 C51     H51B         0.9808                     .       .                   no
 C51     H51C         0.9797                     .       .                   no
 
loop_
_geom_angle_atom_site_label_1
_geom_angle_atom_site_label_2
_geom_angle_atom_site_label_3
_geom_angle
_geom_angle_site_symmetry_1
_geom_angle_site_symmetry_2
_geom_angle_site_symmetry_3
_geom_angle_publ_flag
 S5      Rh4     S6         82.36(7)             .       .       .           yes
 S5      Rh4     C23        107.8(2)             .       .       .           yes
 S5      Rh4     C24        143.6(2)             .       .       .           yes
 S5      Rh4     C25      160.28(19)             .       .       .           yes
 S5      Rh4     C26      123.08(18)             .       .       .           yes
 S5      Rh4     C27       99.84(17)             .       .       .           yes
 S5      Rh4     S7          76.4(2)             .       .       .           yes
 S5      Rh4     S9          80.1(3)             .       .       .           yes
 S5      Rh4     S10        104.4(3)             .       .     4_555         yes
 S5      Rh4     S11        104.1(4)             .       .     4_555         yes
 S6      Rh4     C23      161.49(18)             .       .       .           yes
 S6      Rh4     C24        134.0(2)             .       .       .           yes
 S6      Rh4     C25      102.22(19)             .       .       .           yes
 S6      Rh4     C26       99.00(19)             .       .       .           yes
 S6      Rh4     C27      127.19(18)             .       .       .           yes
 S6      Rh4     S7          97.3(3)             .       .       .           yes
 S6      Rh4     S9          76.8(3)             .       .       .           yes
 S6      Rh4     S10         66.9(3)             .       .     4_555         yes
 S6      Rh4     S11         93.8(4)             .       .     4_555         yes
 C23     Rh4     C24         38.8(3)             .       .       .           yes
 C23     Rh4     C25         63.1(3)             .       .       .           yes
 C23     Rh4     C26         62.5(3)             .       .       .           yes
 C23     Rh4     C27         37.2(3)             .       .       .           yes
 S7      Rh4     C23        100.1(3)             .       .       .           yes
 S9      Rh4     C23        119.6(4)             .       .       .           yes
 S10     Rh4     C23        123.0(4)           4_555     .       .           yes
 S11     Rh4     C23         98.4(4)           4_555     .       .           yes
 C24     Rh4     C25         37.1(3)             .       .       .           yes
 C24     Rh4     C26         62.6(3)             .       .       .           yes
 C24     Rh4     C27         62.8(3)             .       .       .           yes
 S7      Rh4     C24         93.5(3)             .       .       .           yes
 S9      Rh4     C24        103.2(4)             .       .       .           yes
 S10     Rh4     C24         91.4(4)           4_555     .       .           yes
 S11     Rh4     C24         75.5(4)           4_555     .       .           yes
 C25     Rh4     C26         37.6(3)             .       .       .           yes
 C25     Rh4     C27         62.0(2)             .       .       .           yes
 S7      Rh4     C25        121.3(3)             .       .       .           yes
 S9      Rh4     C25        119.6(3)             .       .       .           yes
 S10     Rh4     C25         95.0(3)           4_555     .       .           yes
 S11     Rh4     C25         94.8(4)           4_555     .       .           yes
 C26     Rh4     C27         36.6(2)             .       .       .           yes
 S7      Rh4     C26        156.1(3)             .       .       .           yes
 S9      Rh4     C26        156.1(3)             .       .       .           yes
 S10     Rh4     C26        128.6(3)           4_555     .       .           yes
 S11     Rh4     C26        132.3(4)           4_555     .       .           yes
 S7      Rh4     C27        134.9(3)             .       .       .           yes
 S9      Rh4     C27        155.9(4)             .       .       .           yes
 S10     Rh4     C27        153.8(4)           4_555     .       .           yes
 S11     Rh4     C27        134.8(4)           4_555     .       .           yes
 S5      Rh5     S6         82.63(6)             .       .       .           yes
 S5      Rh5     C33      100.29(19)             .       .       .           yes
 S5      Rh5     C34        130.9(2)             .       .       .           yes
 S5      Rh5     C35        161.6(3)             .       .       .           yes
 S5      Rh5     S6         82.63(6)             .       .     4_555         yes
 S5      Rh5     C33      100.29(19)             .       .     4_555         yes
 S5      Rh5     C34        130.9(2)             .       .     4_555         yes
 S6      Rh5     C33      121.26(14)             .       .       .           yes
 S6      Rh5     C34      100.46(19)             .       .       .           yes
 S6      Rh5     C35        111.2(2)             .       .       .           yes
 S6      Rh5     S6         79.60(5)             .       .     4_555         yes
 S6      Rh5     C33      159.10(14)             .       .     4_555         yes
 S6      Rh5     C34        146.4(2)             .       .     4_555         yes
 C33     Rh5     C34         36.8(3)             .       .       .           yes
 C33     Rh5     C35         62.4(3)             .       .       .           yes
 S6      Rh5     C33      159.10(14)           4_555     .       .           yes
 C33     Rh5     C33         37.9(2)             .       .     4_555         yes
 C33     Rh5     C34         61.9(3)             .       .     4_555         yes
 C34     Rh5     C35         37.1(2)             .       .       .           yes
 S6      Rh5     C34        146.4(2)           4_555     .       .           yes
 C33     Rh5     C34         61.9(3)           4_555     .       .           yes
 C34     Rh5     C34         61.2(3)             .       .     4_555         yes
 S6      Rh5     C35        111.2(2)           4_555     .       .           yes
 C33     Rh5     C35         62.4(3)           4_555     .       .           yes
 C34     Rh5     C35         37.1(2)           4_555     .       .           yes
 S6      Rh5     C33      121.26(14)           4_555     .     4_555         yes
 S6      Rh5     C34      100.46(19)           4_555     .     4_555         yes
 C33     Rh5     C34         36.8(3)           4_555     .     4_555         yes
 S6      Rh6     C39         98.2(2)             .       .       .           yes
 S6      Rh6     C40      104.44(16)             .       .       .           yes
 S6      Rh6     C41       139.85(5)             .       .       .           yes
 S6      Rh6     S8        99.21(10)             .       .       .           yes
 S6      Rh6     S9          74.4(3)             .       .       .           yes
 S6      Rh6     S10        100.3(4)             .       .       .           yes
 S6      Rh6     S6         79.96(5)             .       .     4_555         yes
 S6      Rh6     C39        120.6(2)             .       .     4_555         yes
 S6      Rh6     C40      157.02(19)             .       .     4_555         yes
 S6      Rh6     S10         69.8(4)             .       .     4_555         yes
 C39     Rh6     C40         36.9(3)             .       .       .           yes
 C39     Rh6     C41         61.0(4)             .       .       .           yes
 S8      Rh6     C39        138.7(2)             .       .       .           yes
 S9      Rh6     C39        162.5(2)             .       .       .           yes
 S10     Rh6     C39        160.3(4)             .       .       .           yes
 S6      Rh6     C39        120.6(2)           4_555     .       .           yes
 C39     Rh6     C39         33.1(3)             .       .     4_555         yes
 C39     Rh6     C40         59.9(3)             .       .     4_555         yes
 S10     Rh6     C39        135.2(4)           4_555     .       .           yes
 C40     Rh6     C41         38.0(3)             .       .       .           yes
 S8      Rh6     C40        102.2(2)             .       .       .           yes
 S9      Rh6     C40        128.6(3)             .       .       .           yes
 S10     Rh6     C40        129.8(4)             .       .       .           yes
 S6      Rh6     C40      157.02(19)           4_555     .       .           yes
 C39     Rh6     C40         59.9(3)           4_555     .       .           yes
 C40     Rh6     C40         63.0(2)             .       .     4_555         yes
 S10     Rh6     C40        102.4(4)           4_555     .       .           yes
 S8      Rh6     C41         82.0(4)             .       .       .           yes
 S9      Rh6     C41        114.6(5)             .       .       .           yes
 S10     Rh6     C41         99.9(5)             .       .       .           yes
 S6      Rh6     C41       139.85(5)           4_555     .       .           yes
 C39     Rh6     C41         61.0(4)           4_555     .       .           yes
 C40     Rh6     C41         38.0(3)           4_555     .       .           yes
 S10     Rh6     C41         99.9(5)           4_555     .       .           yes
 S6      Rh6     S8        99.21(10)           4_555     .       .           yes
 S8      Rh6     C39        138.7(2)             .       .     4_555         yes
 S8      Rh6     C40        102.2(2)             .       .     4_555         yes
 S6      Rh6     S9          74.4(3)           4_555     .       .           yes
 S9      Rh6     C39        162.5(2)             .       .     4_555         yes
 S9      Rh6     C40        128.6(3)             .       .     4_555         yes
 S6      Rh6     S10         69.8(4)           4_555     .       .           yes
 S10     Rh6     C39        135.2(4)             .       .     4_555         yes
 S10     Rh6     C40        102.4(4)             .       .     4_555         yes
 S10     Rh6     S10         48.1(4)             .       .     4_555         yes
 S6      Rh6     C39         98.2(2)           4_555     .     4_555         yes
 S6      Rh6     C40      104.44(16)           4_555     .     4_555         yes
 S6      Rh6     S10        100.3(4)           4_555     .     4_555         yes
 C39     Rh6     C40         36.9(3)           4_555     .     4_555         yes
 S10     Rh6     C39        160.3(4)           4_555     .     4_555         yes
 S10     Rh6     C40        129.8(4)           4_555     .     4_555         yes
 S2      Rh1     C5        95.54(16)             .       .       .           yes
 S3      Rh1     C1        97.80(19)             .       .       .           yes
 S3      Rh1     C2        97.21(19)             .       .       .           yes
 S3      Rh1     C3       127.51(18)             .       .       .           yes
 S3      Rh1     C4       159.43(14)             .       .       .           yes
 S3      Rh1     C5       129.72(18)             .       .       .           yes
 C1      Rh1     C2          38.2(2)             .       .       .           yes
 C1      Rh1     C3          63.0(2)             .       .       .           yes
 C1      Rh1     C4          63.4(2)             .       .       .           yes
 C1      Rh1     C5          37.6(2)             .       .       .           yes
 C2      Rh1     C3          37.0(2)             .       .       .           yes
 C2      Rh1     C4          63.1(2)             .       .       .           yes
 C2      Rh1     C5          63.0(2)             .       .       .           yes
 C3      Rh1     C4          38.1(2)             .       .       .           yes
 C3      Rh1     C5          63.1(2)             .       .       .           yes
 C4      Rh1     C5          37.9(2)             .       .       .           yes
 S1      Rh1     C3       100.13(17)             .       .       .           yes
 S1      Rh1     C4       111.84(16)             .       .       .           yes
 S1      Rh1     C5       147.74(18)             .       .       .           yes
 S1      Rh1     S2         78.62(6)             .       .       .           yes
 S1      Rh1     S3         82.53(6)             .       .       .           yes
 S1      Rh1     C1       159.08(18)             .       .       .           yes
 S1      Rh1     C2       120.91(18)             .       .       .           yes
 S2      Rh1     C4       102.57(16)             .       .       .           yes
 S2      Rh1     C1       122.04(18)             .       .       .           yes
 S2      Rh1     C2       158.34(18)             .       .       .           yes
 S2      Rh1     S3         94.50(7)             .       .       .           yes
 S2      Rh1     C3       137.73(18)             .       .       .           yes
 S1      Rh2     C17       97.72(19)             .       .       .           yes
 S1      Rh2     C18      128.82(19)             .       .       .           yes
 S1      Rh2     S3         82.52(6)             .       .       .           yes
 C17     Rh2     C17         38.4(2)             .       .     4_565         yes
 C17     Rh2     C18         62.4(3)             .       .     4_565         yes
 C18     Rh2     C19         37.1(2)             .       .       .           yes
 S3      Rh2     C18      148.63(19)           4_565     .       .           yes
 C17     Rh2     C18         62.4(3)           4_565     .       .           yes
 C18     Rh2     C18         61.8(2)             .       .     4_565         yes
 S3      Rh2     C19      113.55(18)           4_565     .       .           yes
 C17     Rh2     C19         62.3(3)           4_565     .       .           yes
 C18     Rh2     C19         37.1(2)           4_565     .       .           yes
 S3      Rh2     C17      121.57(18)           4_565     .     4_565         yes
 S3      Rh2     C18      101.81(18)           4_565     .     4_565         yes
 C17     Rh2     C18         36.8(3)           4_565     .     4_565         yes
 S3      Rh2     C17      159.94(18)             .       .     4_565         yes
 S3      Rh2     C18      148.63(19)             .       .     4_565         yes
 C17     Rh2     C18         36.8(3)             .       .       .           yes
 C17     Rh2     C19         62.3(3)             .       .       .           yes
 S3      Rh2     C17      159.94(18)           4_565     .       .           yes
 S3      Rh2     C18      101.81(18)             .       .       .           yes
 S3      Rh2     C19      113.55(18)             .       .       .           yes
 S1      Rh2     C19        158.6(2)             .       .       .           yes
 S1      Rh2     S3         82.52(6)             .       .     4_565         yes
 S1      Rh2     C17       97.72(19)             .       .     4_565         yes
 S1      Rh2     C18      128.82(19)             .       .     4_565         yes
 S3      Rh2     C17      121.57(18)             .       .       .           yes
 S3      Rh2     S3         78.42(5)             .       .     4_565         yes
 S3      Rh3     C12        158.1(2)             .       .     4_565         yes
 S3      Rh3     C13      121.31(18)             .       .     4_565         yes
 S3      Rh3     S4         95.05(6)             .       .       .           yes
 S3      Rh3     C11       140.47(4)             .       .       .           yes
 S3      Rh3     C12      104.80(19)             .       .       .           yes
 S3      Rh3     C13       97.12(18)             .       .       .           yes
 S3      Rh3     S3         78.75(5)             .       .     4_565         yes
 S3      Rh3     C12        158.1(2)           4_565     .       .           yes
 C12     Rh3     C12         64.0(3)             .       .     4_565         yes
 C12     Rh3     C13         62.2(3)             .       .     4_565         yes
 S3      Rh3     C13      121.31(18)           4_565     .       .           yes
 C12     Rh3     C13         62.2(3)           4_565     .       .           yes
 C13     Rh3     C13         36.4(2)             .       .     4_565         yes
 S3      Rh3     C12      104.80(19)           4_565     .     4_565         yes
 S3      Rh3     C13       97.12(18)           4_565     .     4_565         yes
 C12     Rh3     C13         37.2(3)           4_565     .     4_565         yes
 S4      Rh3     C13      143.24(19)             .       .     4_565         yes
 C11     Rh3     C12         38.0(2)             .       .       .           yes
 C11     Rh3     C13         61.8(3)             .       .       .           yes
 S3      Rh3     C11       140.47(4)           4_565     .       .           yes
 C11     Rh3     C12         38.0(2)             .       .     4_565         yes
 C11     Rh3     C13         61.8(3)             .       .     4_565         yes
 C12     Rh3     C13         37.2(3)             .       .       .           yes
 S4      Rh3     C12        106.1(2)             .       .     4_565         yes
 S4      Rh3     C12        106.1(2)             .       .       .           yes
 S4      Rh3     C13      143.24(19)             .       .       .           yes
 S4      Rh3     C11         87.3(3)             .       .       .           yes
 S3      Rh3     S4         95.05(6)           4_565     .       .           yes
 Rh4     S5      Rh4       100.11(9)             .       .     4_555         yes
 Rh4     S5      Rh5        96.66(7)           4_555     .       .           yes
 Rh4     S5      Rh5        96.66(7)             .       .       .           yes
 Rh4     S6      Rh5        96.50(6)             .       .       .           yes
 Rh4     S6      Rh6       107.16(7)             .       .       .           yes
 Rh5     S6      Rh6        98.43(5)             .       .       .           yes
 Rh4     S7      Rh4        104.6(4)             .       .     4_555         yes
 Rh4     S9      Rh6        100.4(4)             .       .       .           yes
 Rh4     S9      Rh4         98.1(6)             .       .     4_555         yes
 Rh4     S9      Rh6        100.4(4)           4_555     .       .           yes
 Rh4     S10     S10        112.2(8)           4_555     .     4_555         yes
 Rh6     S10     S10         66.0(6)             .       .     4_555         yes
 Rh4     S10     Rh6        109.8(6)           4_555     .       .           yes
 Rh4     S11     S11       115.7(10)           4_555     .     4_555         yes
 Rh1     S1      Rh2        96.72(6)             .       .       .           yes
 Rh1     S1      Rh2        96.72(6)           4_565     .       .           yes
 Rh1     S1      Rh1        99.19(9)             .       .     4_565         yes
 Rh1     S2      Rh1       102.21(9)             .       .     4_565         yes
 Rh1     S2      S4        107.28(8)             .       .       .           yes
 Rh1     S2      S4        107.28(8)           4_565     .       .           yes
 Rh2     S3      Rh3        98.00(5)             .       .       .           yes
 Rh1     S3      Rh2        96.33(6)             .       .       .           yes
 Rh1     S3      Rh3       112.68(6)             .       .       .           yes
 Rh3     S4      S2       105.24(12)             .       .       .           yes
 Rh4     C23     C24         71.2(4)             .       .       .           yes
 Rh4     C23     C28        125.8(5)             .       .       .           yes
 C24     C23     C27        107.0(6)             .       .       .           no
 Rh4     C23     C27         72.7(4)             .       .       .           yes
 C27     C23     C28        127.1(8)             .       .       .           no
 C24     C23     C28        125.6(7)             .       .       .           no
 C23     C24     C29        126.0(7)             .       .       .           no
 C25     C24     C29        127.1(8)             .       .       .           no
 Rh4     C24     C23         70.0(4)             .       .       .           yes
 Rh4     C24     C25         71.3(4)             .       .       .           yes
 Rh4     C24     C29        123.5(6)             .       .       .           yes
 C23     C24     C25        106.8(6)             .       .       .           no
 Rh4     C25     C24         71.6(4)             .       .       .           yes
 C24     C25     C26        109.1(6)             .       .       .           no
 Rh4     C25     C26         72.2(3)             .       .       .           yes
 Rh4     C25     C30        124.6(5)             .       .       .           yes
 C24     C25     C30        126.9(8)             .       .       .           no
 C26     C25     C30        123.9(7)             .       .       .           no
 Rh4     C26     C25         70.3(4)             .       .       .           yes
 Rh4     C26     C31        126.2(5)             .       .       .           yes
 C25     C26     C27        107.6(6)             .       .       .           no
 Rh4     C26     C27         71.6(3)             .       .       .           yes
 C27     C26     C31        126.0(7)             .       .       .           no
 C25     C26     C31        126.3(7)             .       .       .           no
 Rh4     C27     C32        124.7(5)             .       .       .           yes
 C23     C27     C26        109.4(6)             .       .       .           no
 Rh4     C27     C23         70.0(4)             .       .       .           yes
 Rh4     C27     C26         71.8(4)             .       .       .           yes
 C23     C27     C32        123.5(7)             .       .       .           no
 C26     C27     C32        127.2(7)             .       .       .           no
 Rh5     C33     C34         71.7(4)             .       .       .           yes
 C34     C33     C36        128.6(6)             .       .       .           no
 Rh5     C33     C36        125.7(5)             .       .       .           yes
 Rh5     C33     C33         71.1(4)             .       .     4_555         yes
 C33     C33     C34        107.0(6)           4_555     .       .           no
 C33     C33     C36        124.3(6)           4_555     .       .           no
 Rh5     C34     C33         71.6(4)             .       .       .           yes
 C35     C34     C37        124.5(8)             .       .       .           no
 C33     C34     C37        125.6(7)             .       .       .           no
 C33     C34     C35        109.8(6)             .       .       .           no
 Rh5     C34     C35         71.6(5)             .       .       .           yes
 Rh5     C34     C37        123.4(6)             .       .       .           yes
 Rh5     C35     C34         71.3(5)             .       .     4_555         yes
 Rh5     C35     C38        128.3(8)             .       .       .           yes
 Rh5     C35     C34         71.3(5)             .       .       .           yes
 C34     C35     C38        126.7(5)             .       .       .           no
 C34     C35     C34        106.2(8)             .       .     4_555         no
 C34     C35     C38        126.7(5)           4_555     .       .           no
 Rh6     C39     C40         67.9(4)             .       .       .           yes
 Rh6     C39     C42        125.1(6)             .       .       .           yes
 Rh6     C39     C39         73.4(5)             .       .     4_555         yes
 C39     C39     C42        128.8(9)           4_555     .       .           no
 C40     C39     C42        120.9(7)             .       .       .           no
 C39     C39     C40        110.3(8)           4_555     .       .           no
 C41     C40     C43        133.0(9)             .       .       .           no
 Rh6     C40     C39         75.2(4)             .       .       .           yes
 Rh6     C40     C41         71.2(6)             .       .       .           yes
 Rh6     C40     C43        125.7(6)             .       .       .           yes
 C39     C40     C41        106.2(7)             .       .       .           no
 C39     C40     C43        120.2(8)             .       .       .           no
 Rh6     C41     C40         70.9(6)             .       .       .           yes
 Rh6     C41     C44       128.5(12)             .       .       .           yes
 Rh6     C41     C40         70.9(6)             .       .     4_555         yes
 C40     C41     C44        126.5(5)             .       .       .           no
 C40     C41     C40       106.7(10)             .       .     4_555         no
 C40     C41     C44        126.5(5)           4_555     .       .           no
 C23     C28     H28B         109.40             .       .       .           no
 C23     C28     H28A         109.43             .       .       .           no
 H28A    C28     H28B         109.56             .       .       .           no
 H28A    C28     H28C         109.44             .       .       .           no
 C23     C28     H28C         109.49             .       .       .           no
 H28B    C28     H28C         109.52             .       .       .           no
 C24     C29     H29B         109.47             .       .       .           no
 C24     C29     H29C         109.49             .       .       .           no
 C24     C29     H29A         109.49             .       .       .           no
 H29A    C29     H29C         109.46             .       .       .           no
 H29B    C29     H29C         109.51             .       .       .           no
 H29A    C29     H29B         109.41             .       .       .           no
 H30A    C30     H30B         109.46             .       .       .           no
 H30A    C30     H30C         109.56             .       .       .           no
 C25     C30     H30A         109.48             .       .       .           no
 C25     C30     H30B         109.36             .       .       .           no
 C25     C30     H30C         109.50             .       .       .           no
 H30B    C30     H30C         109.46             .       .       .           no
 H31A    C31     H31C         109.46             .       .       .           no
 H31B    C31     H31C         109.43             .       .       .           no
 C26     C31     H31A         109.53             .       .       .           no
 C26     C31     H31B         109.40             .       .       .           no
 C26     C31     H31C         109.51             .       .       .           no
 H31A    C31     H31B         109.50             .       .       .           no
 H32B    C32     H32C         109.47             .       .       .           no
 C27     C32     H32C         109.44             .       .       .           no
 C27     C32     H32A         109.49             .       .       .           no
 C27     C32     H32B         109.61             .       .       .           no
 H32A    C32     H32B         109.45             .       .       .           no
 H32A    C32     H32C         109.36             .       .       .           no
 H36A    C36     H36C         109.55             .       .       .           no
 H36A    C36     H36B         109.41             .       .       .           no
 C33     C36     H36A         109.43             .       .       .           no
 C33     C36     H36B         109.44             .       .       .           no
 C33     C36     H36C         109.48             .       .       .           no
 H36B    C36     H36C         109.51             .       .       .           no
 C34     C37     H37A         109.43             .       .       .           no
 C34     C37     H37B         109.48             .       .       .           no
 C34     C37     H37C         109.52             .       .       .           no
 H37A    C37     H37B         109.49             .       .       .           no
 H37A    C37     H37C         109.40             .       .       .           no
 H37B    C37     H37C         109.52             .       .       .           no
 C35     C38     H38A         109.46             .       .       .           no
 C35     C38     H38B         109.46             .       .       .           no
 C35     C38     H38C         109.43             .       .       .           no
 H38A    C38     H38B         109.46             .       .       .           no
 H38A    C38     H38C         109.50             .       .       .           no
 H38B    C38     H38C         109.50             .       .       .           no
 C39     C42     H42A         109.41             .       .       .           no
 C39     C42     H42B         109.43             .       .       .           no
 C39     C42     H42C         109.42             .       .       .           no
 H42A    C42     H42B         109.50             .       .       .           no
 H42A    C42     H42C         109.51             .       .       .           no
 H42B    C42     H42C         109.56             .       .       .           no
 C40     C43     H43A         109.39             .       .       .           no
 C40     C43     H43B         109.48             .       .       .           no
 C40     C43     H43C         109.55             .       .       .           no
 H43A    C43     H43B         109.44             .       .       .           no
 H43A    C43     H43C         109.34             .       .       .           no
 H43B    C43     H43C         109.62             .       .       .           no
 C41     C44     H44A         109.44             .       .       .           no
 C41     C44     H44B         109.51             .       .       .           no
 C41     C44     H44C         109.51             .       .       .           no
 H44A    C44     H44B         109.48             .       .       .           no
 H44A    C44     H44C         109.38             .       .       .           no
 H44B    C44     H44C         109.51             .       .       .           no
 Rh1     C1      C2          71.4(3)             .       .       .           yes
 Rh1     C1      C5          71.7(3)             .       .       .           yes
 Rh1     C1      C6         124.3(4)             .       .       .           yes
 C2      C1      C5         107.7(6)             .       .       .           no
 C2      C1      C6         125.6(6)             .       .       .           no
 C5      C1      C6         126.7(6)             .       .       .           no
 Rh1     C2      C1          70.4(3)             .       .       .           yes
 Rh1     C2      C3          71.4(3)             .       .       .           yes
 Rh1     C2      C7         126.0(4)             .       .       .           yes
 C1      C2      C3         108.2(6)             .       .       .           no
 C1      C2      C7         124.2(6)             .       .       .           no
 C3      C2      C7         127.6(6)             .       .       .           no
 Rh1     C3      C2          71.7(4)             .       .       .           yes
 Rh1     C3      C4          70.3(3)             .       .       .           yes
 Rh1     C3      C8         125.5(4)             .       .       .           yes
 C2      C3      C4         108.5(6)             .       .       .           no
 C2      C3      C8         127.6(6)             .       .       .           no
 C4      C3      C8         123.9(6)             .       .       .           no
 Rh1     C4      C3          71.7(3)             .       .       .           yes
 Rh1     C4      C5          71.9(3)             .       .       .           yes
 Rh1     C4      C9         126.8(4)             .       .       .           yes
 C3      C4      C5         107.6(5)             .       .       .           no
 C3      C4      C9         126.0(6)             .       .       .           no
 C5      C4      C9         126.1(6)             .       .       .           no
 Rh1     C5      C1          70.7(4)             .       .       .           yes
 Rh1     C5      C4          70.2(3)             .       .       .           yes
 Rh1     C5      C10        124.5(4)             .       .       .           yes
 C1      C5      C4         108.0(6)             .       .       .           no
 C1      C5      C10        125.0(6)             .       .       .           no
 C4      C5      C10        127.0(6)             .       .       .           no
 Rh3     C11     C12         70.8(5)             .       .       .           yes
 Rh3     C11     C14        127.5(8)             .       .       .           yes
 Rh3     C11     C12         70.8(5)             .       .     4_565         yes
 C12     C11     C14        125.6(5)             .       .       .           no
 C12     C11     C12        108.6(8)             .       .     4_565         no
 C12     C11     C14        125.6(5)           4_565     .       .           no
 Rh3     C12     C11         71.2(5)             .       .       .           yes
 Rh3     C12     C13         72.7(4)             .       .       .           yes
 Rh3     C12     C15        126.0(6)             .       .       .           yes
 C11     C12     C13        106.3(6)             .       .       .           no
 C11     C12     C15        126.0(8)             .       .       .           no
 C13     C12     C15        127.4(7)             .       .       .           no
 Rh3     C13     C12         70.1(4)             .       .       .           yes
 Rh3     C13     C16        125.4(5)             .       .       .           yes
 Rh3     C13     C13         71.8(4)             .       .     4_565         yes
 C12     C13     C16        123.8(6)             .       .       .           no
 C12     C13     C13        109.3(6)             .       .     4_565         no
 C13     C13     C16        126.9(7)           4_565     .       .           no
 Rh2     C17     C18         72.6(4)             .       .       .           yes
 Rh2     C17     C20        126.8(5)             .       .       .           yes
 Rh2     C17     C17         70.8(4)             .       .     4_565         yes
 C18     C17     C20        127.3(6)             .       .       .           no
 C17     C17     C18        107.5(6)           4_565     .       .           no
 C17     C17     C20        124.9(6)           4_565     .       .           no
 Rh2     C18     C17         70.6(4)             .       .       .           yes
 Rh2     C18     C19         72.1(5)             .       .       .           yes
 Rh2     C18     C21        125.5(5)             .       .       .           yes
 C17     C18     C19        109.1(6)             .       .       .           no
 C17     C18     C21        126.9(7)             .       .       .           no
 C19     C18     C21        124.0(7)             .       .       .           no
 Rh2     C19     C18         70.8(5)             .       .       .           yes
 Rh2     C19     C22        137.3(7)             .       .       .           yes
 Rh2     C19     C18         70.8(5)             .       .     4_565         yes
 C18     C19     C22        125.4(4)             .       .       .           no
 C18     C19     C18        106.9(7)             .       .     4_565         no
 C18     C19     C22        125.4(4)           4_565     .       .           no
 C1      C6      H6A          109.49             .       .       .           no
 C1      C6      H6B          109.51             .       .       .           no
 C1      C6      H6C          109.46             .       .       .           no
 H6A     C6      H6B          109.32             .       .       .           no
 H6A     C6      H6C          109.49             .       .       .           no
 H6B     C6      H6C          109.55             .       .       .           no
 C2      C7      H7A          109.45             .       .       .           no
 C2      C7      H7B          109.49             .       .       .           no
 C2      C7      H7C          109.41             .       .       .           no
 H7A     C7      H7B          109.47             .       .       .           no
 H7A     C7      H7C          109.51             .       .       .           no
 H7B     C7      H7C          109.50             .       .       .           no
 C3      C8      H8A          109.48             .       .       .           no
 C3      C8      H8B          109.44             .       .       .           no
 C3      C8      H8C          109.53             .       .       .           no
 H8A     C8      H8B          109.47             .       .       .           no
 H8A     C8      H8C          109.37             .       .       .           no
 H8B     C8      H8C          109.53             .       .       .           no
 C4      C9      H9A          109.46             .       .       .           no
 C4      C9      H9B          109.48             .       .       .           no
 C4      C9      H9C          109.49             .       .       .           no
 H9A     C9      H9B          109.51             .       .       .           no
 H9A     C9      H9C          109.51             .       .       .           no
 H9B     C9      H9C          109.38             .       .       .           no
 C5      C10     H10A         109.44             .       .       .           no
 C5      C10     H10B         109.44             .       .       .           no
 C5      C10     H10C         109.50             .       .       .           no
 H10A    C10     H10B         109.43             .       .       .           no
 H10A    C10     H10C         109.50             .       .       .           no
 H10B    C10     H10C         109.52             .       .       .           no
 C11     C14     H14A         109.45             .       .       .           no
 C11     C14     H14B         109.43             .       .       .           no
 C11     C14     H14C         109.48             .       .       .           no
 H14A    C14     H14B         109.37             .       .       .           no
 H14A    C14     H14C         109.62             .       .       .           no
 H14B    C14     H14C         109.48             .       .       .           no
 C12     C15     H15A         109.47             .       .       .           no
 C12     C15     H15B         109.54             .       .       .           no
 C12     C15     H15C         109.36             .       .       .           no
 H15A    C15     H15B         109.55             .       .       .           no
 H15A    C15     H15C         109.42             .       .       .           no
 H15B    C15     H15C         109.49             .       .       .           no
 C13     C16     H16A         109.52             .       .       .           no
 C13     C16     H16B         109.48             .       .       .           no
 C13     C16     H16C         109.53             .       .       .           no
 H16A    C16     H16B         109.47             .       .       .           no
 H16A    C16     H16C         109.54             .       .       .           no
 H16B    C16     H16C         109.28             .       .       .           no
 C17     C20     H20A         109.41             .       .       .           no
 C17     C20     H20B         109.57             .       .       .           no
 C17     C20     H20C         109.43             .       .       .           no
 H20A    C20     H20B         109.50             .       .       .           no
 H20A    C20     H20C         109.42             .       .       .           no
 H20B    C20     H20C         109.50             .       .       .           no
 C18     C21     H21A         109.44             .       .       .           no
 C18     C21     H21B         109.48             .       .       .           no
 C18     C21     H21C         109.39             .       .       .           no
 H21A    C21     H21B         109.55             .       .       .           no
 H21A    C21     H21C         109.50             .       .       .           no
 H21B    C21     H21C         109.46             .       .       .           no
 C19     C22     H22A         109.42             .       .       .           no
 C19     C22     H22B         109.49             .       .       .           no
 C19     C22     H22C         109.43             .       .       .           no
 C19     C22     H22A         109.42             .       .     4_565         no
 C19     C22     H22B         109.49             .       .     4_565         no
 H22A    C22     H22B         109.47             .       .       .           no
 H22A    C22     H22C         109.79             .       .       .           no
 H22A    C22     H22A         108.99             .       .     4_565         no
 H22B    C22     H22C         109.23             .       .       .           no
 H22B    C22     H22B         109.95             .       .     4_565         no
 H22A    C22     H22C         109.79           4_565     .       .           no
 H22B    C22     H22C         109.23           4_565     .       .           no
 H22A    C22     H22B         109.47           4_565     .     4_565         no
 C46     C45     C50       118.2(15)             .       .       .           no
 C46     C45     C51       118.1(15)             .       .       .           no
 C50     C45     C51       123.8(13)             .       .       .           no
 C45     C46     C47       121.7(14)             .       .       .           no
 C46     C47     C48       121.7(14)             .       .       .           no
 C47     C48     C49       117.7(15)             .       .       .           no
 C48     C49     C50       119.8(17)             .       .       .           no
 C45     C50     C49       121.0(14)             .       .       .           no
 C45     C46     H46          119.10             .       .       .           no
 C47     C46     H46          119.24             .       .       .           no
 C46     C47     H47          119.15             .       .       .           no
 C48     C47     H47          119.16             .       .       .           no
 C47     C48     H48          121.15             .       .       .           no
 C49     C48     H48          121.14             .       .       .           no
 C48     C49     H49          120.16             .       .       .           no
 C50     C49     H49          120.07             .       .       .           no
 C45     C50     H50          119.53             .       .       .           no
 C49     C50     H50          119.45             .       .       .           no
 C45     C51     H51A         109.51             .       .       .           no
 C45     C51     H51B         109.47             .       .       .           no
 C45     C51     H51C         109.48             .       .       .           no
 H51A    C51     H51B         109.49             .       .       .           no
 H51A    C51     H51C         109.54             .       .       .           no
 H51B    C51     H51C         109.34             .       .       .           no
 
loop_
_geom_torsion_atom_site_label_1
_geom_torsion_atom_site_label_2
_geom_torsion_atom_site_label_3
_geom_torsion_atom_site_label_4
_geom_torsion
_geom_torsion_site_symmetry_1
_geom_torsion_site_symmetry_2
_geom_torsion_site_symmetry_3
_geom_torsion_site_symmetry_4
_geom_torsion_publ_flag
 S6      Rh4     S5      Rh5       -10.37(6)     .       .       .       .   no
 S6      Rh4     S5      Rh4        87.64(8)     .       .       .     4_555 no
 C23     Rh4     S5      Rh5        153.7(2)     .       .       .       .   no
 C23     Rh4     S5      Rh4       -108.3(2)     .       .       .     4_555 no
 C24     Rh4     S5      Rh5        173.0(3)     .       .       .       .   no
 C24     Rh4     S5      Rh4        -89.0(3)     .       .       .     4_555 no
 C26     Rh4     S5      Rh5         85.4(2)     .       .       .       .   no
 C26     Rh4     S5      Rh4       -176.6(2)     .       .       .     4_555 no
 C27     Rh4     S5      Rh5      116.20(19)     .       .       .       .   no
 C27     Rh4     S5      Rh4     -145.79(19)     .       .       .     4_555 no
 S5      Rh4     S6      Rh5        10.29(6)     .       .       .       .   no
 S5      Rh4     S6      Rh6       -90.65(7)     .       .       .       .   no
 C24     Rh4     S6      Rh5       -172.5(3)     .       .       .       .   no
 C24     Rh4     S6      Rh6         86.5(3)     .       .       .       .   no
 C25     Rh4     S6      Rh5     -150.23(19)     .       .       .       .   no
 C25     Rh4     S6      Rh6      108.83(19)     .       .       .       .   no
 C26     Rh4     S6      Rh5     -112.14(18)     .       .       .       .   no
 C26     Rh4     S6      Rh6      146.92(18)     .       .       .       .   no
 C27     Rh4     S6      Rh5        -86.3(2)     .       .       .       .   no
 C27     Rh4     S6      Rh6        172.8(2)     .       .       .       .   no
 S5      Rh4     C23     C24        161.7(3)     .       .       .       .   no
 S5      Rh4     C23     C27        -82.8(4)     .       .       .       .   no
 S5      Rh4     C23     C28         40.9(8)     .       .       .       .   no
 C24     Rh4     C23     C27        115.5(6)     .       .       .       .   no
 C24     Rh4     C23     C28       -120.9(9)     .       .       .       .   no
 C25     Rh4     C23     C24        -37.2(4)     .       .       .       .   no
 C25     Rh4     C23     C27         78.3(4)     .       .       .       .   no
 C25     Rh4     C23     C28       -158.1(8)     .       .       .       .   no
 C26     Rh4     C23     C24        -79.6(4)     .       .       .       .   no
 C26     Rh4     C23     C27         35.8(4)     .       .       .       .   no
 C26     Rh4     C23     C28        159.5(8)     .       .       .       .   no
 C27     Rh4     C23     C24       -115.5(6)     .       .       .       .   no
 C27     Rh4     C23     C28        123.7(9)     .       .       .       .   no
 S5      Rh4     C24     C23        -30.2(6)     .       .       .       .   no
 S5      Rh4     C24     C25       -146.8(3)     .       .       .       .   no
 S5      Rh4     C24     C29         90.5(8)     .       .       .       .   no
 S6      Rh4     C24     C23        154.5(3)     .       .       .       .   no
 S6      Rh4     C24     C25         37.9(5)     .       .       .       .   no
 S6      Rh4     C24     C29        -84.8(8)     .       .       .       .   no
 C23     Rh4     C24     C25       -116.6(6)     .       .       .       .   no
 C23     Rh4     C24     C29        120.7(9)     .       .       .       .   no
 C25     Rh4     C24     C23        116.6(6)     .       .       .       .   no
 C25     Rh4     C24     C29       -122.7(9)     .       .       .       .   no
 C26     Rh4     C24     C23         79.3(4)     .       .       .       .   no
 C26     Rh4     C24     C25        -37.3(4)     .       .       .       .   no
 C26     Rh4     C24     C29       -160.0(8)     .       .       .       .   no
 C27     Rh4     C24     C23         37.9(4)     .       .       .       .   no
 C27     Rh4     C24     C25        -78.7(4)     .       .       .       .   no
 C27     Rh4     C24     C29        158.6(8)     .       .       .       .   no
 S6      Rh4     C25     C24       -153.1(4)     .       .       .       .   no
 S6      Rh4     C25     C26         88.9(4)     .       .       .       .   no
 S6      Rh4     C25     C30        -30.4(8)     .       .       .       .   no
 C23     Rh4     C25     C24         38.9(4)     .       .       .       .   no
 C23     Rh4     C25     C26        -79.1(4)     .       .       .       .   no
 C23     Rh4     C25     C30        161.6(8)     .       .       .       .   no
 C24     Rh4     C25     C26       -118.0(6)     .       .       .       .   no
 C24     Rh4     C25     C30        122.7(9)     .       .       .       .   no
 C26     Rh4     C25     C24        118.0(6)     .       .       .       .   no
 C26     Rh4     C25     C30       -119.4(9)     .       .       .       .   no
 C27     Rh4     C25     C24         81.1(5)     .       .       .       .   no
 C27     Rh4     C25     C26        -36.9(4)     .       .       .       .   no
 C27     Rh4     C25     C30       -156.3(8)     .       .       .       .   no
 S5      Rh4     C26     C25        174.9(3)     .       .       .       .   no
 S5      Rh4     C26     C27         57.7(5)     .       .       .       .   no
 S5      Rh4     C26     C31        -64.0(7)     .       .       .       .   no
 S6      Rh4     C26     C25        -98.4(4)     .       .       .       .   no
 S6      Rh4     C26     C27        144.4(4)     .       .       .       .   no
 S6      Rh4     C26     C31         22.7(7)     .       .       .       .   no
 C23     Rh4     C26     C25         80.8(5)     .       .       .       .   no
 C23     Rh4     C26     C27        -36.5(4)     .       .       .       .   no
 C23     Rh4     C26     C31       -158.1(8)     .       .       .       .   no
 C24     Rh4     C26     C25         36.9(4)     .       .       .       .   no
 C24     Rh4     C26     C27        -80.4(5)     .       .       .       .   no
 C24     Rh4     C26     C31        157.9(8)     .       .       .       .   no
 C25     Rh4     C26     C27       -117.3(6)     .       .       .       .   no
 C25     Rh4     C26     C31        121.1(8)     .       .       .       .   no
 C27     Rh4     C26     C25        117.3(6)     .       .       .       .   no
 C27     Rh4     C26     C31       -121.7(8)     .       .       .       .   no
 S5      Rh4     C27     C23        106.5(4)     .       .       .       .   no
 S5      Rh4     C27     C26       -134.1(4)     .       .       .       .   no
 S5      Rh4     C27     C32        -11.0(6)     .       .       .       .   no
 S6      Rh4     C27     C23       -165.7(3)     .       .       .       .   no
 S6      Rh4     C27     C26        -46.2(5)     .       .       .       .   no
 S6      Rh4     C27     C32         76.8(6)     .       .       .       .   no
 C23     Rh4     C27     C26        119.4(6)     .       .       .       .   no
 C23     Rh4     C27     C32       -117.5(8)     .       .       .       .   no
 C24     Rh4     C27     C23        -39.5(4)     .       .       .       .   no
 C24     Rh4     C27     C26         79.9(4)     .       .       .       .   no
 C24     Rh4     C27     C32       -157.0(7)     .       .       .       .   no
 C25     Rh4     C27     C23        -81.6(4)     .       .       .       .   no
 C25     Rh4     C27     C26         37.9(4)     .       .       .       .   no
 C25     Rh4     C27     C32        160.9(7)     .       .       .       .   no
 C26     Rh4     C27     C23       -119.4(6)     .       .       .       .   no
 C26     Rh4     C27     C32        123.0(8)     .       .       .       .   no
 S6      Rh5     S5      Rh4        10.32(6)     .       .       .       .   no
 S6      Rh5     S5      Rh4       -90.72(7)     .       .       .     4_555 no
 C33     Rh5     S5      Rh4     -110.23(15)     .       .       .       .   no
 C33     Rh5     S5      Rh4      148.73(15)     .       .       .     4_555 no
 C34     Rh5     S5      Rh4        -87.2(3)     .       .       .       .   no
 C34     Rh5     S5      Rh4        171.8(3)     .       .       .     4_555 no
 S6      Rh5     S5      Rh4        90.72(7)   4_555     .       .       .   no
 C33     Rh5     S5      Rh4     -148.73(15)   4_555     .       .       .   no
 C34     Rh5     S5      Rh4       -171.8(3)   4_555     .       .       .   no
 S5      Rh5     S6      Rh4       -10.37(5)     .       .       .       .   no
 S5      Rh5     S6      Rh6        98.11(6)     .       .       .       .   no
 C33     Rh5     S6      Rh4         87.2(2)     .       .       .       .   no
 C33     Rh5     S6      Rh6       -164.3(2)     .       .       .       .   no
 C34     Rh5     S6      Rh4        120.0(2)     .       .       .       .   no
 C34     Rh5     S6      Rh6       -131.6(2)     .       .       .       .   no
 C35     Rh5     S6      Rh4        157.0(2)     .       .       .       .   no
 C35     Rh5     S6      Rh6        -94.5(2)     .       .       .       .   no
 S6      Rh5     S6      Rh4       -94.18(6)   4_555     .       .       .   no
 S6      Rh5     S6      Rh6        14.30(6)   4_555     .       .       .   no
 C33     Rh5     S6      Rh4         89.2(5)   4_555     .       .       .   no
 C33     Rh5     S6      Rh6       -162.3(5)   4_555     .       .       .   no
 C34     Rh5     S6      Rh4        172.5(3)   4_555     .       .       .   no
 C34     Rh5     S6      Rh6        -79.0(4)   4_555     .       .       .   no
 S5      Rh5     C33     C34        150.3(3)     .       .       .       .   no
 S5      Rh5     C33     C36         25.6(6)     .       .       .       .   no
 S5      Rh5     C33     C33        -93.6(4)     .       .       .     4_555 no
 S6      Rh5     C33     C34         62.8(4)     .       .       .       .   no
 S6      Rh5     C33     C36        -62.0(6)     .       .       .       .   no
 S6      Rh5     C33     C33        178.9(3)     .       .       .     4_555 no
 C34     Rh5     C33     C36       -124.8(7)     .       .       .       .   no
 C34     Rh5     C33     C33        116.1(6)     .       .       .     4_555 no
 C35     Rh5     C33     C34        -36.4(4)     .       .       .       .   no
 C35     Rh5     C33     C36       -161.2(6)     .       .       .       .   no
 C35     Rh5     C33     C33         79.7(4)     .       .       .     4_555 no
 S6      Rh5     C33     C34       -113.4(5)   4_555     .       .       .   no
 S6      Rh5     C33     C36        121.9(6)   4_555     .       .       .   no
 C33     Rh5     C33     C34       -116.1(6)   4_555     .       .       .   no
 C33     Rh5     C33     C36        119.1(8)   4_555     .       .       .   no
 C34     Rh5     C33     C34        -78.6(4)   4_555     .       .       .   no
 C34     Rh5     C33     C36        156.7(7)   4_555     .       .       .   no
 S5      Rh5     C34     C33        -40.1(5)     .       .       .       .   no
 S5      Rh5     C34     C35       -159.3(4)     .       .       .       .   no
 S5      Rh5     C34     C37         80.9(8)     .       .       .       .   no
 S6      Rh5     C34     C33       -129.4(3)     .       .       .       .   no
 S6      Rh5     C34     C35        111.4(5)     .       .       .       .   no
 S6      Rh5     C34     C37         -8.4(7)     .       .       .       .   no
 C33     Rh5     C34     C35       -119.2(6)     .       .       .       .   no
 C33     Rh5     C34     C37        121.0(9)     .       .       .       .   no
 C35     Rh5     C34     C33        119.2(6)     .       .       .       .   no
 C35     Rh5     C34     C37       -119.8(9)     .       .       .       .   no
 S6      Rh5     C34     C33        143.7(3)   4_555     .       .       .   no
 S6      Rh5     C34     C35         24.5(7)   4_555     .       .       .   no
 S6      Rh5     C34     C37        -95.3(7)   4_555     .       .       .   no
 C33     Rh5     C34     C33         38.7(4)   4_555     .       .       .   no
 C33     Rh5     C34     C35        -80.5(5)   4_555     .       .       .   no
 C33     Rh5     C34     C37        159.7(8)   4_555     .       .       .   no
 C34     Rh5     C34     C33         80.7(4)   4_555     .       .       .   no
 C34     Rh5     C34     C35        -38.5(5)   4_555     .       .       .   no
 C34     Rh5     C34     C37       -158.3(8)   4_555     .       .       .   no
 S6      Rh5     C35     C34        -79.0(5)     .       .       .       .   no
 S6      Rh5     C35     C38        43.36(8)     .       .       .       .   no
 S6      Rh5     C35     C34        165.8(4)     .       .       .     4_555 no
 C33     Rh5     C35     C34         36.1(4)     .       .       .       .   no
 C33     Rh5     C35     C38      158.52(17)     .       .       .       .   no
 C33     Rh5     C35     C34        -79.1(5)     .       .       .     4_555 no
 C34     Rh5     C35     C38        122.4(4)     .       .       .       .   no
 C34     Rh5     C35     C34       -115.2(8)     .       .       .     4_555 no
 S6      Rh5     C35     C34       -165.8(4)   4_555     .       .       .   no
 C33     Rh5     C35     C34         79.1(5)   4_555     .       .       .   no
 C34     Rh5     C35     C34        115.2(8)   4_555     .       .       .   no
 S6      Rh5     S6      Rh6       -14.30(6)     .       .     4_555     .   no
 C33     Rh5     S6      Rh6        162.3(5)     .       .     4_555     .   no
 C34     Rh5     S6      Rh6         79.0(4)     .       .     4_555     .   no
 S5      Rh5     C33     C33         93.6(4)     .       .     4_555     .   no
 S6      Rh5     C33     C33         -2.7(8)     .       .     4_555     .   no
 C34     Rh5     C33     C33        -37.5(4)     .       .     4_555     .   no
 C35     Rh5     C33     C33        -79.7(4)     .       .     4_555     .   no
 S6      Rh5     C34     C35        -24.5(7)     .       .     4_555     .   no
 C33     Rh5     C34     C35         80.5(5)     .       .     4_555     .   no
 C34     Rh5     C34     C35         38.5(5)     .       .     4_555     .   no
 C39     Rh6     S6      Rh4       -155.0(2)     .       .       .       .   no
 C39     Rh6     S6      Rh5        105.5(2)     .       .       .       .   no
 C40     Rh6     S6      Rh4     -117.90(19)     .       .       .       .   no
 C40     Rh6     S6      Rh5      142.57(19)     .       .       .       .   no
 C41     Rh6     S6      Rh4       -101.1(6)     .       .       .       .   no
 C41     Rh6     S6      Rh5        159.4(6)     .       .       .       .   no
 S6      Rh6     S6      Rh4        85.19(7)   4_555     .       .       .   no
 S6      Rh6     S6      Rh5       -14.34(6)   4_555     .       .       .   no
 C39     Rh6     S6      Rh4        178.8(2)   4_555     .       .       .   no
 C39     Rh6     S6      Rh5         79.3(3)   4_555     .       .       .   no
 C40     Rh6     S6      Rh4       -171.4(4)   4_555     .       .       .   no
 C40     Rh6     S6      Rh5         89.0(4)   4_555     .       .       .   no
 S6      Rh6     C39     C40        103.2(4)     .       .       .       .   no
 S6      Rh6     C39     C42        -10.0(8)     .       .       .       .   no
 S6      Rh6     C39     C39       -136.1(5)     .       .       .     4_555 no
 C40     Rh6     C39     C42       -113.1(9)     .       .       .       .   no
 C40     Rh6     C39     C39        120.8(7)     .       .       .     4_555 no
 C41     Rh6     C39     C40        -40.3(4)     .       .       .       .   no
 C41     Rh6     C39     C42       -153.4(8)     .       .       .       .   no
 C41     Rh6     C39     C39         80.5(5)     .       .       .     4_555 no
 S6      Rh6     C39     C40       -173.7(3)   4_555     .       .       .   no
 S6      Rh6     C39     C42         73.2(8)   4_555     .       .       .   no
 C39     Rh6     C39     C40       -120.8(7)   4_555     .       .       .   no
 C39     Rh6     C39     C42       126.1(10)   4_555     .       .       .   no
 C40     Rh6     C39     C40        -84.2(4)   4_555     .       .       .   no
 C40     Rh6     C39     C42        162.7(9)   4_555     .       .       .   no
 S6      Rh6     C40     C39        -84.4(4)     .       .       .       .   no
 S6      Rh6     C40     C41        162.4(5)     .       .       .       .   no
 S6      Rh6     C40     C43         32.4(8)     .       .       .       .   no
 C39     Rh6     C40     C41       -113.2(7)     .       .       .       .   no
 C39     Rh6     C40     C43        116.8(9)     .       .       .       .   no
 C41     Rh6     C40     C39        113.2(7)     .       .       .       .   no
 C41     Rh6     C40     C43      -130.0(11)     .       .       .       .   no
 S6      Rh6     C40     C39         14.0(7)   4_555     .       .       .   no
 S6      Rh6     C40     C41        -99.2(7)   4_555     .       .       .   no
 S6      Rh6     C40     C43        130.8(7)   4_555     .       .       .   no
 C39     Rh6     C40     C39         32.9(5)   4_555     .       .       .   no
 C39     Rh6     C40     C41        -80.4(6)   4_555     .       .       .   no
 C39     Rh6     C40     C43        149.7(9)   4_555     .       .       .   no
 C40     Rh6     C40     C39         75.0(4)   4_555     .       .       .   no
 C40     Rh6     C40     C41        -38.3(6)   4_555     .       .       .   no
 C40     Rh6     C40     C43       -168.3(9)   4_555     .       .       .   no
 S6      Rh6     C41     C40        -27.1(9)     .       .       .       .   no
 S6      Rh6     C41     C44         94.8(4)     .       .       .       .   no
 S6      Rh6     C41     C40       -143.3(3)     .       .       .     4_555 no
 C39     Rh6     C41     C40         39.1(5)     .       .       .       .   no
 C39     Rh6     C41     C44        161.0(3)     .       .       .       .   no
 C39     Rh6     C41     C40        -77.1(6)     .       .       .     4_555 no
 C40     Rh6     C41     C44        121.9(5)     .       .       .       .   no
 C40     Rh6     C41     C40       -116.2(9)     .       .       .     4_555 no
 S6      Rh6     C41     C40        143.3(3)   4_555     .       .       .   no
 C39     Rh6     C41     C40         77.1(6)   4_555     .       .       .   no
 C40     Rh6     C41     C40        116.2(9)   4_555     .       .       .   no
 S6      Rh6     S6      Rh5        14.34(6)     .       .     4_555     .   no
 C39     Rh6     S6      Rh5        -79.3(3)     .       .     4_555     .   no
 C40     Rh6     S6      Rh5        -89.0(4)     .       .     4_555     .   no
 S6      Rh6     C39     C39         52.9(6)     .       .     4_555     .   no
 C40     Rh6     C39     C39        -36.6(5)     .       .     4_555     .   no
 C41     Rh6     C39     C39        -80.5(5)     .       .     4_555     .   no
 S6      Rh6     C40     C41         99.2(7)     .       .     4_555     .   no
 C39     Rh6     C40     C41         80.4(6)     .       .     4_555     .   no
 C40     Rh6     C40     C41         38.3(6)     .       .     4_555     .   no
 C4      Rh1     C2      C1          80.5(4)     .       .       .       .   no
 C4      Rh1     C2      C3         -37.6(4)     .       .       .       .   no
 C4      Rh1     C2      C7        -160.9(7)     .       .       .       .   no
 C5      Rh1     C2      C1          37.7(4)     .       .       .       .   no
 C5      Rh1     C2      C3         -80.3(4)     .       .       .       .   no
 C5      Rh1     C2      C7         156.3(7)     .       .       .       .   no
 S1      Rh1     C3      C2        -129.1(4)     .       .       .       .   no
 S1      Rh1     C3      C4         112.6(3)     .       .       .       .   no
 S1      Rh1     C3      C8          -5.6(6)     .       .       .       .   no
 S2      Rh1     C3      C2         146.7(3)     .       .       .       .   no
 S2      Rh1     C3      C4          28.5(4)     .       .       .       .   no
 S2      Rh1     C3      C8         -89.8(6)     .       .       .       .   no
 S3      Rh1     C3      C2         -40.8(5)     .       .       .       .   no
 S3      Rh1     C3      C4        -159.1(3)     .       .       .       .   no
 S3      Rh1     C3      C8          82.7(6)     .       .       .       .   no
 C1      Rh1     C3      C2          37.8(4)     .       .       .       .   no
 C1      Rh1     C3      C4         -80.5(4)     .       .       .       .   no
 C1      Rh1     C3      C8         161.3(7)     .       .       .       .   no
 C2      Rh1     C3      C4        -118.3(5)     .       .       .       .   no
 C2      Rh1     C3      C8         123.5(8)     .       .       .       .   no
 C4      Rh1     C3      C2         118.3(5)     .       .       .       .   no
 C4      Rh1     C3      C8        -118.2(7)     .       .       .       .   no
 C5      Rh1     C3      C2          80.1(4)     .       .       .       .   no
 C5      Rh1     C3      C4         -38.1(3)     .       .       .       .   no
 C5      Rh1     C3      C8        -156.4(6)     .       .       .       .   no
 S1      Rh1     C4      C3         -78.2(3)     .       .       .       .   no
 S1      Rh1     C4      C5         165.4(3)     .       .       .       .   no
 S1      Rh1     C4      C9          43.4(7)     .       .       .       .   no
 S2      Rh1     C4      C3        -160.8(3)     .       .       .       .   no
 S2      Rh1     C4      C5          82.8(3)     .       .       .       .   no
 S2      Rh1     C4      C9         -39.2(7)     .       .       .       .   no
 S3      Rh1     C4      C3          53.8(7)     .       .       .       .   no
 S3      Rh1     C4      C5         -62.6(7)     .       .       .       .   no
 S3      Rh1     C4      C9         175.5(5)     .       .       .       .   no
 C1      Rh1     C4      C3          79.4(4)     .       .       .       .   no
 C1      Rh1     C4      C5         -36.9(3)     .       .       .       .   no
 C1      Rh1     C4      C9        -158.9(7)     .       .       .       .   no
 C2      Rh1     C4      C3          36.4(3)     .       .       .       .   no
 C2      Rh1     C4      C5         -79.9(4)     .       .       .       .   no
 C2      Rh1     C4      C9         158.1(7)     .       .       .       .   no
 C3      Rh1     C4      C5        -116.4(5)     .       .       .       .   no
 C3      Rh1     C4      C9         121.7(8)     .       .       .       .   no
 C5      Rh1     C4      C3         116.4(5)     .       .       .       .   no
 C5      Rh1     C4      C9        -122.0(8)     .       .       .       .   no
 S1      Rh1     C5      C1        -144.2(3)     .       .       .       .   no
 S1      Rh1     C5      C4         -25.9(5)     .       .       .       .   no
 S1      Rh1     C5      C10         96.0(6)     .       .       .       .   no
 S2      Rh1     C5      C1         138.4(4)     .       .       .       .   no
 S2      Rh1     C5      C4        -103.4(3)     .       .       .       .   no
 S2      Rh1     C5      C10         18.6(6)     .       .       .       .   no
 S3      Rh1     C5      C1          37.8(5)     .       .       .       .   no
 S3      Rh1     C5      C4         156.1(3)     .       .       .       .   no
 S3      Rh1     C5      C10        -81.9(6)     .       .       .       .   no
 C1      Rh1     C5      C4         118.3(5)     .       .       .       .   no
 C1      Rh1     C5      C10       -119.8(7)     .       .       .       .   no
 C2      Rh1     C5      C1         -38.3(4)     .       .       .       .   no
 C2      Rh1     C5      C4          80.0(4)     .       .       .       .   no
 C2      Rh1     C5      C10       -158.1(6)     .       .       .       .   no
 C3      Rh1     C5      C1         -80.0(4)     .       .       .       .   no
 C3      Rh1     C5      C4          38.3(3)     .       .       .       .   no
 C3      Rh1     C5      C10        160.3(6)     .       .       .       .   no
 C4      Rh1     C5      C1        -118.3(5)     .       .       .       .   no
 C4      Rh1     C5      C10        122.0(7)     .       .       .       .   no
 C3      Rh1     S1      Rh1     -145.68(19)     .       .       .     4_565 no
 C4      Rh1     S1      Rh2      154.21(18)     .       .       .       .   no
 C4      Rh1     S1      Rh1     -107.84(18)     .       .       .     4_565 no
 C5      Rh1     S1      Rh2        171.0(3)     .       .       .       .   no
 C5      Rh1     S1      Rh1        -91.0(3)     .       .       .     4_565 no
 S1      Rh1     S2      S4       121.68(10)     .       .       .       .   no
 S1      Rh1     S2      Rh1         9.00(7)     .       .       .     4_565 no
 S3      Rh1     S2      S4        40.25(10)     .       .       .       .   no
 S3      Rh1     S2      Rh1       -72.44(8)     .       .       .     4_565 no
 C1      Rh1     S2      S4         -61.9(2)     .       .       .       .   no
 C1      Rh1     S2      Rh1       -174.5(2)     .       .       .     4_565 no
 C2      Rh1     S2      S4         -82.4(5)     .       .       .       .   no
 C2      Rh1     S2      Rh1        164.9(5)     .       .       .     4_565 no
 C3      Rh1     S2      S4        -145.7(3)     .       .       .       .   no
 C3      Rh1     S2      Rh1        101.6(3)     .       .       .     4_565 no
 C4      Rh1     S2      S4      -128.20(18)     .       .       .       .   no
 C4      Rh1     S2      Rh1      119.12(18)     .       .       .     4_565 no
 C5      Rh1     S2      S4         -90.4(2)     .       .       .       .   no
 C5      Rh1     S2      Rh1      156.90(19)     .       .       .     4_565 no
 S1      Rh1     S3      Rh2        10.41(6)     .       .       .       .   no
 S1      Rh1     S3      Rh3       -91.01(7)     .       .       .       .   no
 S2      Rh1     S3      Rh2        88.30(6)     .       .       .       .   no
 S2      Rh1     S3      Rh3       -13.13(8)     .       .       .       .   no
 C1      Rh1     S3      Rh2     -148.49(18)     .       .       .       .   no
 C1      Rh1     S3      Rh3      110.09(18)     .       .       .       .   no
 C2      Rh1     S3      Rh2     -109.96(18)     .       .       .       .   no
 C2      Rh1     S3      Rh3      148.62(18)     .       .       .       .   no
 C3      Rh1     S3      Rh2        -86.7(2)     .       .       .       .   no
 C3      Rh1     S3      Rh3        171.9(2)     .       .       .       .   no
 C4      Rh1     S3      Rh2       -125.5(5)     .       .       .       .   no
 C4      Rh1     S3      Rh3        133.1(5)     .       .       .       .   no
 C5      Rh1     S3      Rh2       -170.7(2)     .       .       .       .   no
 C5      Rh1     S3      Rh3         87.9(2)     .       .       .       .   no
 S1      Rh1     C1      C2           2.3(8)     .       .       .       .   no
 S1      Rh1     C1      C5         119.0(5)     .       .       .       .   no
 S1      Rh1     C1      C6        -118.6(6)     .       .       .       .   no
 S2      Rh1     C1      C2        -167.9(3)     .       .       .       .   no
 S2      Rh1     C1      C5         -51.3(4)     .       .       .       .   no
 S2      Rh1     C1      C6          71.1(6)     .       .       .       .   no
 S3      Rh1     C1      C2          91.8(4)     .       .       .       .   no
 S3      Rh1     C1      C5        -151.6(4)     .       .       .       .   no
 S3      Rh1     C1      C6         -29.2(6)     .       .       .       .   no
 C2      Rh1     C1      C5         116.7(6)     .       .       .       .   no
 C2      Rh1     C1      C6        -121.0(8)     .       .       .       .   no
 C3      Rh1     C1      C2         -36.5(4)     .       .       .       .   no
 C3      Rh1     C1      C5          80.1(4)     .       .       .       .   no
 C3      Rh1     C1      C6        -157.5(7)     .       .       .       .   no
 C4      Rh1     C1      C2         -79.4(4)     .       .       .       .   no
 C4      Rh1     C1      C5          37.3(4)     .       .       .       .   no
 C4      Rh1     C1      C6         159.6(7)     .       .       .       .   no
 C5      Rh1     C1      C2        -116.7(6)     .       .       .       .   no
 C5      Rh1     C1      C6         122.4(8)     .       .       .       .   no
 S1      Rh1     C2      C1        -179.0(3)     .       .       .       .   no
 S1      Rh1     C2      C3          62.9(4)     .       .       .       .   no
 S1      Rh1     C2      C7         -60.5(6)     .       .       .       .   no
 S2      Rh1     C2      C1          28.7(8)     .       .       .       .   no
 S2      Rh1     C2      C3         -89.3(6)     .       .       .       .   no
 S2      Rh1     C2      C7         147.3(5)     .       .       .       .   no
 S3      Rh1     C2      C1         -93.5(4)     .       .       .       .   no
 S3      Rh1     C2      C3         148.5(4)     .       .       .       .   no
 S3      Rh1     C2      C7          25.1(6)     .       .       .       .   no
 C1      Rh1     C2      C3        -118.0(6)     .       .       .       .   no
 C1      Rh1     C2      C7         118.6(8)     .       .       .       .   no
 C3      Rh1     C2      C1         118.0(6)     .       .       .       .   no
 C3      Rh1     C2      C7        -123.4(8)     .       .       .       .   no
 C3      Rh1     S1      Rh2      116.37(19)     .       .       .       .   no
 S2      Rh1     S1      Rh1        -8.72(7)     .       .       .     4_565 no
 S3      Rh1     S1      Rh2       -10.53(6)     .       .       .       .   no
 S3      Rh1     S1      Rh1        87.43(7)     .       .       .     4_565 no
 C1      Rh1     S1      Rh2         81.8(5)     .       .       .       .   no
 C1      Rh1     S1      Rh1        179.7(5)     .       .       .     4_565 no
 C2      Rh1     S1      Rh2         83.4(2)     .       .       .       .   no
 S2      Rh1     S1      Rh2      -106.68(8)     .       .       .       .   no
 C2      Rh1     S1      Rh1       -178.6(2)     .       .       .     4_565 no
 C17     Rh2     C19     C18        -80.1(5)     .       .       .     4_565 no
 C18     Rh2     C19     C22        121.7(4)     .       .       .       .   no
 C17     Rh2     C19     C22        158.2(2)     .       .       .       .   no
 S3      Rh2     C19     C18       -165.3(4)   4_565     .       .       .   no
 C17     Rh2     C19     C18         80.1(5)   4_565     .       .       .   no
 C18     Rh2     C19     C18       -116.6(7)     .       .       .     4_565 no
 C17     Rh2     C19     C18         36.5(4)     .       .       .       .   no
 C17     Rh2     C18     C19         79.6(5)     .       .     4_565     .   no
 C18     Rh2     C18     C19         37.8(4)     .       .     4_565     .   no
 S3      Rh2     S3      Rh3        19.70(5)   4_565     .       .       .   no
 C17     Rh2     S3      Rh1         81.5(6)   4_565     .       .       .   no
 C17     Rh2     S3      Rh3       -164.4(6)   4_565     .       .       .   no
 C18     Rh2     S3      Rh1        171.9(3)   4_565     .       .       .   no
 C18     Rh2     C19     C18        116.6(7)   4_565     .       .       .   no
 S3      Rh2     S3      Rh3       -19.70(5)     .       .     4_565     .   no
 C17     Rh2     S3      Rh3        164.4(6)     .       .     4_565     .   no
 C18     Rh2     S3      Rh3         74.1(3)     .       .     4_565     .   no
 S1      Rh2     C17     C17         92.7(4)     .       .     4_565     .   no
 S3      Rh2     C17     C17          3.4(8)     .       .     4_565     .   no
 C18     Rh2     C17     C17        -37.3(4)     .       .     4_565     .   no
 C19     Rh2     C17     C17        -79.4(4)     .       .     4_565     .   no
 S3      Rh2     C18     C19        -26.5(6)     .       .     4_565     .   no
 C19     Rh2     C17     C18        -36.8(4)     .       .       .       .   no
 C19     Rh2     C17     C20       -160.8(7)     .       .       .       .   no
 C19     Rh2     C17     C17         79.4(4)     .       .       .     4_565 no
 S3      Rh2     C17     C18       -119.6(5)   4_565     .       .       .   no
 S3      Rh2     C17     C20        116.4(6)   4_565     .       .       .   no
 C17     Rh2     C17     C18       -116.2(6)   4_565     .       .       .   no
 C17     Rh2     C17     C20        119.8(8)   4_565     .       .       .   no
 C18     Rh2     C17     C18        -78.9(4)   4_565     .       .       .   no
 C18     Rh2     C17     C20        157.1(7)   4_565     .       .       .   no
 S1      Rh2     C18     C17        -38.0(5)     .       .       .       .   no
 S1      Rh2     C18     C19       -156.6(4)     .       .       .       .   no
 S1      Rh2     C18     C21         84.0(7)     .       .       .       .   no
 S3      Rh2     C18     C17       -127.9(4)     .       .       .       .   no
 S3      Rh2     C18     C19        113.6(4)     .       .       .       .   no
 S3      Rh2     C18     C21         -5.9(7)     .       .       .       .   no
 C17     Rh2     C18     C19       -118.6(6)     .       .       .       .   no
 C17     Rh2     C18     C21        122.0(8)     .       .       .       .   no
 C19     Rh2     C18     C17        118.6(6)     .       .       .       .   no
 C19     Rh2     C18     C21       -119.4(8)     .       .       .       .   no
 S3      Rh2     C18     C17        145.1(4)   4_565     .       .       .   no
 S3      Rh2     C18     C19         26.5(6)   4_565     .       .       .   no
 S3      Rh2     C18     C21        -92.9(7)   4_565     .       .       .   no
 C18     Rh2     S3      Rh3        -74.1(3)   4_565     .       .       .   no
 S1      Rh2     C17     C18        151.1(4)     .       .       .       .   no
 S1      Rh2     C17     C20         27.1(6)     .       .       .       .   no
 S1      Rh2     C17     C17        -92.7(4)     .       .       .     4_565 no
 S3      Rh2     C17     C18         65.1(4)     .       .       .       .   no
 S3      Rh2     C17     C20        -58.9(7)     .       .       .       .   no
 S3      Rh2     C17     C17       -178.6(3)     .       .       .     4_565 no
 C18     Rh2     C17     C20       -124.0(8)     .       .       .       .   no
 C18     Rh2     C17     C17        116.2(6)     .       .       .     4_565 no
 S3      Rh2     S1      Rh1        10.45(6)     .       .       .       .   no
 S3      Rh2     S1      Rh1       -89.68(6)     .       .       .     4_565 no
 C17     Rh2     S1      Rh1     -110.56(19)     .       .       .       .   no
 C17     Rh2     S1      Rh1      149.32(18)     .       .       .     4_565 no
 C18     Rh2     S1      Rh1        -88.7(2)     .       .       .       .   no
 C18     Rh2     S1      Rh1        171.2(2)     .       .       .     4_565 no
 C19     Rh2     S1      Rh1      -129.94(5)     .       .       .       .   no
 S3      Rh2     S1      Rh1        89.68(6)   4_565     .       .       .   no
 C17     Rh2     S1      Rh1     -149.32(18)   4_565     .       .       .   no
 C18     Rh2     S1      Rh1       -171.2(2)   4_565     .       .       .   no
 S1      Rh2     S3      Rh1       -10.49(5)     .       .       .       .   no
 S1      Rh2     S3      Rh3       103.54(6)     .       .       .       .   no
 C17     Rh2     S3      Rh1         84.0(2)     .       .       .       .   no
 C17     Rh2     S3      Rh3       -162.0(2)     .       .       .       .   no
 C18     Rh2     S3      Rh1      117.71(19)     .       .       .       .   no
 C18     Rh2     S3      Rh3     -128.26(19)     .       .       .       .   no
 C19     Rh2     S3      Rh1      154.83(18)     .       .       .       .   no
 C19     Rh2     S3      Rh3      -91.14(19)     .       .       .       .   no
 S3      Rh2     S3      Rh1       -94.34(6)   4_565     .       .       .   no
 C18     Rh2     C18     C17         80.8(4)   4_565     .       .       .   no
 C18     Rh2     C18     C19        -37.8(4)   4_565     .       .       .   no
 C18     Rh2     C18     C21       -157.2(7)   4_565     .       .       .   no
 S1      Rh2     C19     C18         58.3(4)     .       .       .       .   no
 C17     Rh2     C18     C17         38.9(4)   4_565     .       .       .   no
 C17     Rh2     C18     C19        -79.6(5)   4_565     .       .       .   no
 C17     Rh2     C18     C21        161.0(7)   4_565     .       .       .   no
 S3      Rh2     C19     C18        165.3(4)     .       .       .     4_565 no
 S1      Rh2     C19     C22       180.00(1)     .       .       .       .   no
 S3      Rh2     C19     C18        -78.1(5)     .       .       .       .   no
 S3      Rh2     C19     C22        43.60(8)     .       .       .       .   no
 S4      Rh3     S3      Rh2      -113.90(6)     .       .       .       .   no
 C11     Rh3     S3      Rh1       -105.4(4)     .       .       .       .   no
 C11     Rh3     S3      Rh2        154.3(4)     .       .       .       .   no
 S4      Rh3     S3      Rh1       -13.57(7)     .       .       .       .   no
 C11     Rh3     S4      S2        180.00(1)     .       .       .       .   no
 C12     Rh3     S4      S2       146.55(19)     .       .       .       .   no
 C13     Rh3     S4      S2         148.6(3)     .       .       .       .   no
 S3      Rh3     C11     C12        -26.1(7)     .       .       .       .   no
 S3      Rh3     C11     C14         94.6(3)     .       .       .       .   no
 S3      Rh3     C11     C12       -144.7(3)     .       .       .     4_565 no
 S4      Rh3     C11     C12       -120.7(4)     .       .       .       .   no
 S4      Rh3     C11     C14         0.00(1)     .       .       .       .   no
 C12     Rh3     C11     C14        120.7(4)     .       .       .       .   no
 C12     Rh3     C11     C12       -118.6(7)     .       .       .     4_565 no
 C13     Rh3     C11     C12         38.6(4)     .       .       .       .   no
 C13     Rh3     C11     C14        159.3(2)     .       .       .       .   no
 C13     Rh3     C11     C12        -80.0(5)     .       .       .     4_565 no
 S3      Rh3     C11     C12        144.7(3)   4_565     .       .       .   no
 C12     Rh3     C11     C12        118.6(7)   4_565     .       .       .   no
 C13     Rh3     C11     C12         80.0(5)   4_565     .       .       .   no
 S3      Rh3     C12     C11        163.2(4)     .       .       .       .   no
 S3      Rh3     C12     C13        -82.2(4)     .       .       .       .   no
 S3      Rh3     C12     C15         41.9(8)     .       .       .       .   no
 S4      Rh3     C12     C11         63.4(4)     .       .       .       .   no
 C12     Rh3     S3      Rh1       -121.7(2)     .       .       .       .   no
 C12     Rh3     S3      Rh2        138.0(2)     .       .       .       .   no
 C13     Rh3     S3      Rh1     -158.81(19)     .       .       .       .   no
 C13     Rh3     S3      Rh2      100.86(18)     .       .       .       .   no
 S3      Rh3     S3      Rh1        80.59(7)   4_565     .       .       .   no
 S3      Rh3     S3      Rh2       -19.74(6)   4_565     .       .       .   no
 C12     Rh3     S3      Rh1       -177.7(5)   4_565     .       .       .   no
 C12     Rh3     S3      Rh2         82.0(5)   4_565     .       .       .   no
 C13     Rh3     S3      Rh1        172.1(2)   4_565     .       .       .   no
 C13     Rh3     S3      Rh2         71.8(2)   4_565     .       .       .   no
 S3      Rh3     S4      S2         39.56(4)     .       .       .       .   no
 C12     Rh3     C12     C11        -37.0(5)   4_565     .       .       .   no
 C12     Rh3     C12     C13         77.6(4)   4_565     .       .       .   no
 C12     Rh3     C12     C15       -158.3(9)   4_565     .       .       .   no
 C13     Rh3     C12     C11        -78.9(5)   4_565     .       .       .   no
 C13     Rh3     C12     C13         35.7(4)   4_565     .       .       .   no
 C13     Rh3     C12     C15        159.8(9)   4_565     .       .       .   no
 S3      Rh3     C13     C12        105.1(4)     .       .       .       .   no
 S3      Rh3     C13     C16        -12.8(6)     .       .       .       .   no
 S3      Rh3     C13     C13       -135.6(4)     .       .       .     4_565 no
 S4      Rh3     C13     C12         -3.2(6)     .       .       .       .   no
 S4      Rh3     C13     C16       -121.2(6)     .       .       .       .   no
 S4      Rh3     C13     C13        116.1(4)     .       .       .     4_565 no
 C11     Rh3     C13     C12        -39.4(4)     .       .       .       .   no
 C11     Rh3     C13     C16       -157.4(7)     .       .       .       .   no
 C11     Rh3     C13     C13         79.9(4)     .       .       .     4_565 no
 C12     Rh3     C13     C16       -117.9(8)     .       .       .       .   no
 C12     Rh3     C13     C13        119.3(6)     .       .       .     4_565 no
 S3      Rh3     C13     C12       -173.7(3)   4_565     .       .       .   no
 S3      Rh3     C13     C16         68.4(6)   4_565     .       .       .   no
 C12     Rh3     C13     C12        -82.7(5)   4_565     .       .       .   no
 C12     Rh3     C13     C16        159.4(7)   4_565     .       .       .   no
 C13     Rh3     C13     C12       -119.3(6)   4_565     .       .       .   no
 C13     Rh3     C13     C16        122.8(8)   4_565     .       .       .   no
 S3      Rh3     S3      Rh2        19.74(6)     .       .     4_565     .   no
 C12     Rh3     S3      Rh2        -82.0(5)     .       .     4_565     .   no
 C13     Rh3     S3      Rh2        -71.8(2)     .       .     4_565     .   no
 S3      Rh3     C12     C11        100.2(6)     .       .     4_565     .   no
 C12     Rh3     C12     C11         37.0(5)     .       .     4_565     .   no
 C13     Rh3     C12     C11         78.9(5)     .       .     4_565     .   no
 S3      Rh3     C13     C13         54.4(4)     .       .     4_565     .   no
 S4      Rh3     C13     C13       -116.1(4)     .       .     4_565     .   no
 C11     Rh3     C13     C13        -79.9(4)     .       .     4_565     .   no
 C12     Rh3     C13     C13        -36.6(4)     .       .     4_565     .   no
 S4      Rh3     C12     C15        -58.0(8)     .       .       .       .   no
 C11     Rh3     C12     C13        114.6(6)     .       .       .       .   no
 C11     Rh3     C12     C15      -121.3(10)     .       .       .       .   no
 C13     Rh3     C12     C11       -114.6(6)     .       .       .       .   no
 C13     Rh3     C12     C15        124.0(9)     .       .       .       .   no
 S3      Rh3     C12     C11       -100.2(6)   4_565     .       .       .   no
 S4      Rh3     C12     C13        178.0(4)     .       .       .       .   no
 S3      Rh3     C12     C15        138.5(7)   4_565     .       .       .   no
 S3      Rh3     C12     C13         14.5(8)   4_565     .       .       .   no
 Rh1     S2      S4      Rh3       -54.60(7)     .       .       .       .   no
 C27     C23     C24     C25         -2.2(8)     .       .       .       .   no
 C27     C23     C24     Rh4        -64.4(5)     .       .       .       .   no
 C28     C23     C24     C25       -176.7(7)     .       .       .       .   no
 C27     C23     C24     C29        178.1(7)     .       .       .       .   no
 C28     C23     C24     Rh4        121.1(7)     .       .       .       .   no
 Rh4     C23     C24     C25         62.2(5)     .       .       .       .   no
 Rh4     C23     C24     C29       -117.6(8)     .       .       .       .   no
 C24     C23     C27     Rh4         63.3(5)     .       .       .       .   no
 C24     C23     C27     C26          2.1(7)     .       .       .       .   no
 C24     C23     C27     C32       -177.6(6)     .       .       .       .   no
 C28     C23     C27     Rh4       -122.2(8)     .       .       .       .   no
 C28     C23     C24     C29         3.5(12)     .       .       .       .   no
 Rh4     C23     C27     C26        -61.3(4)     .       .       .       .   no
 Rh4     C23     C27     C32        119.1(6)     .       .       .       .   no
 C28     C23     C27     C26        176.5(7)     .       .       .       .   no
 C28     C23     C27     C32        -3.2(11)     .       .       .       .   no
 C23     C24     C25     Rh4        -61.4(5)     .       .       .       .   no
 C29     C24     C25     Rh4        118.4(8)     .       .       .       .   no
 C23     C24     C25     C26          1.5(8)     .       .       .       .   no
 C23     C24     C25     C30        178.7(7)     .       .       .       .   no
 Rh4     C24     C25     C26         62.9(5)     .       .       .       .   no
 Rh4     C24     C25     C30       -119.9(8)     .       .       .       .   no
 C29     C24     C25     C30        -1.5(13)     .       .       .       .   no
 C29     C24     C25     C26       -178.8(7)     .       .       .       .   no
 Rh4     C25     C26     C31       -121.0(7)     .       .       .       .   no
 Rh4     C25     C26     C27         62.3(4)     .       .       .       .   no
 C24     C25     C26     C31        176.6(7)     .       .       .       .   no
 C24     C25     C26     Rh4        -62.5(5)     .       .       .       .   no
 C24     C25     C26     C27         -0.2(7)     .       .       .       .   no
 C30     C25     C26     C31        -0.8(11)     .       .       .       .   no
 C30     C25     C26     Rh4        120.2(7)     .       .       .       .   no
 C30     C25     C26     C27       -177.5(7)     .       .       .       .   no
 C25     C26     C27     C23         -1.2(7)     .       .       .       .   no
 C31     C26     C27     C23       -178.0(6)     .       .       .       .   no
 C25     C26     C27     C32        178.4(6)     .       .       .       .   no
 C31     C26     C27     Rh4        121.8(7)     .       .       .       .   no
 C25     C26     C27     Rh4        -61.4(4)     .       .       .       .   no
 Rh4     C26     C27     C23         60.2(4)     .       .       .       .   no
 Rh4     C26     C27     C32       -120.2(7)     .       .       .       .   no
 C31     C26     C27     C32         1.7(11)     .       .       .       .   no
 C36     C33     C33     C34        176.1(7)     .       .     4_555   4_555 no
 C36     C33     C33     C36         0.0(12)     .       .     4_555   4_555 no
 C36     C33     C33     Rh5       -120.8(7)     .       .     4_555     .   no
 Rh5     C33     C34     C35         61.8(6)     .       .       .       .   no
 Rh5     C33     C34     C37       -118.4(8)     .       .       .       .   no
 C36     C33     C34     Rh5        121.4(8)     .       .       .       .   no
 C36     C33     C34     C35       -176.8(8)     .       .       .       .   no
 C36     C33     C34     C37         3.1(13)     .       .       .       .   no
 C33     C33     C34     Rh5        -62.7(5)   4_555     .       .       .   no
 C33     C33     C34     C35         -0.9(9)   4_555     .       .       .   no
 C33     C33     C34     C37        179.0(7)   4_555     .       .       .   no
 C34     C33     C33     Rh5         63.1(5)     .       .     4_555     .   no
 C34     C33     C33     C34          0.0(8)     .       .     4_555   4_555 no
 C34     C33     C33     C36       -176.1(7)     .       .     4_555   4_555 no
 Rh5     C34     C35     C34         63.2(6)     .       .       .     4_555 no
 C33     C34     C35     Rh5        -61.7(5)     .       .       .       .   no
 C33     C34     C35     C38        173.9(9)     .       .       .       .   no
 C33     C34     C35     C34         1.5(10)     .       .       .     4_555 no
 C37     C34     C35     Rh5        118.4(8)     .       .       .       .   no
 C37     C34     C35     C38        -6.0(15)     .       .       .       .   no
 Rh5     C34     C35     C38      -124.3(10)     .       .       .       .   no
 C37     C34     C35     C34       -178.4(8)     .       .       .     4_555 no
 C42     C39     C40     C41       -176.4(9)     .       .       .       .   no
 C42     C39     C40     C43        -4.3(12)     .       .       .       .   no
 C42     C39     C40     Rh6        118.7(8)     .       .       .       .   no
 C39     C39     C40     C41         3.5(10)   4_555     .       .       .   no
 C39     C39     C40     C43        175.6(8)   4_555     .       .       .   no
 C39     C39     C40     Rh6        -61.4(6)   4_555     .       .       .   no
 Rh6     C39     C40     C41         64.9(7)     .       .       .       .   no
 Rh6     C39     C40     C43       -123.0(7)     .       .       .       .   no
 C40     C39     C39     C42       -179.8(9)     .       .     4_555   4_555 no
 C42     C39     C39     Rh6      -122.1(10)     .       .     4_555     .   no
 C42     C39     C39     C40        179.8(9)     .       .     4_555   4_555 no
 C42     C39     C39     C42         0.0(16)     .       .     4_555   4_555 no
 C40     C39     C39     Rh6         58.1(6)     .       .     4_555     .   no
 C40     C39     C39     C40         0.0(10)     .       .     4_555   4_555 no
 Rh6     C40     C41     C44      -124.3(16)     .       .       .       .   no
 C39     C40     C41     C40        -5.5(11)     .       .       .     4_555 no
 C43     C40     C41     Rh6       121.7(10)     .       .       .       .   no
 C43     C40     C41     C44           -3(2)     .       .       .       .   no
 C43     C40     C41     C40       -176.1(9)     .       .       .     4_555 no
 C39     C40     C41     C44       168.0(14)     .       .       .       .   no
 Rh6     C40     C41     C40         62.2(7)     .       .       .     4_555 no
 C39     C40     C41     Rh6        -67.7(6)     .       .       .       .   no
 Rh1     C1      C2      C3          61.7(4)     .       .       .       .   no
 Rh1     C1      C2      C7        -120.8(6)     .       .       .       .   no
 C5      C1      C2      Rh1        -62.9(4)     .       .       .       .   no
 C5      C1      C2      C3          -1.2(6)     .       .       .       .   no
 C5      C1      C2      C7         176.3(5)     .       .       .       .   no
 C6      C1      C2      Rh1        119.4(6)     .       .       .       .   no
 C6      C1      C2      C3        -178.9(6)     .       .       .       .   no
 C6      C1      C2      C7          -1.4(9)     .       .       .       .   no
 Rh1     C1      C5      C4         -60.6(4)     .       .       .       .   no
 Rh1     C1      C5      C10        119.2(6)     .       .       .       .   no
 C2      C1      C5      Rh1         62.7(4)     .       .       .       .   no
 C2      C1      C5      C4           2.1(6)     .       .       .       .   no
 C2      C1      C5      C10       -178.0(5)     .       .       .       .   no
 C6      C1      C5      Rh1       -119.6(6)     .       .       .       .   no
 C6      C1      C5      C4         179.8(5)     .       .       .       .   no
 C6      C1      C5      C10         -0.4(9)     .       .       .       .   no
 Rh1     C2      C3      C4          60.9(4)     .       .       .       .   no
 Rh1     C2      C3      C8        -121.1(6)     .       .       .       .   no
 C1      C2      C3      Rh1        -61.1(4)     .       .       .       .   no
 C1      C2      C3      C4          -0.2(6)     .       .       .       .   no
 C1      C2      C3      C8         177.8(6)     .       .       .       .   no
 C7      C2      C3      Rh1        121.5(6)     .       .       .       .   no
 C7      C2      C3      C4        -177.6(6)     .       .       .       .   no
 C7      C2      C3      C8          0.5(10)     .       .       .       .   no
 Rh1     C3      C4      C5          63.3(4)     .       .       .       .   no
 Rh1     C3      C4      C9        -122.6(6)     .       .       .       .   no
 C2      C3      C4      Rh1        -61.8(4)     .       .       .       .   no
 C2      C3      C4      C5           1.5(6)     .       .       .       .   no
 C2      C3      C4      C9         175.6(5)     .       .       .       .   no
 C8      C3      C4      Rh1        120.1(6)     .       .       .       .   no
 C8      C3      C4      C5        -176.6(5)     .       .       .       .   no
 C8      C3      C4      C9          -2.5(9)     .       .       .       .   no
 Rh1     C4      C5      C1          61.0(4)     .       .       .       .   no
 Rh1     C4      C5      C10       -118.9(6)     .       .       .       .   no
 C3      C4      C5      Rh1        -63.2(4)     .       .       .       .   no
 C3      C4      C5      C1          -2.2(6)     .       .       .       .   no
 C3      C4      C5      C10        177.9(6)     .       .       .       .   no
 C9      C4      C5      Rh1        122.7(6)     .       .       .       .   no
 C9      C4      C5      C1        -176.4(5)     .       .       .       .   no
 C9      C4      C5      C10          3.8(9)     .       .       .       .   no
 Rh3     C11     C12     C13        -64.7(5)     .       .       .       .   no
 Rh3     C11     C12     C15        121.4(8)     .       .       .       .   no
 C14     C11     C12     Rh3      -122.9(11)     .       .       .       .   no
 C14     C11     C12     C13       172.4(10)     .       .       .       .   no
 C14     C11     C12     C15        -1.6(16)     .       .       .       .   no
 C12     C11     C12     Rh3         61.0(6)   4_565     .       .       .   no
 C12     C11     C12     C13         -3.7(9)   4_565     .       .       .   no
 C12     C11     C12     C15       -177.6(8)   4_565     .       .       .   no
 C12     C11     C12     Rh3        -61.0(6)     .       .     4_565     .   no
 Rh3     C12     C13     C16        120.0(7)     .       .       .       .   no
 Rh3     C12     C13     C13        -61.4(5)     .       .       .     4_565 no
 C11     C12     C13     Rh3         63.7(6)     .       .       .       .   no
 C11     C12     C13     C16       -176.4(7)     .       .       .       .   no
 C11     C12     C13     C13          2.3(9)     .       .       .     4_565 no
 C15     C12     C13     Rh3       -122.5(8)     .       .       .       .   no
 C15     C12     C13     C16        -2.5(12)     .       .       .       .   no
 C15     C12     C13     C13        176.1(8)     .       .       .     4_565 no
 C12     C13     C13     Rh3         60.3(5)     .       .     4_565     .   no
 C12     C13     C13     C12          0.0(8)     .       .     4_565   4_565 no
 C12     C13     C13     C16       -178.6(7)     .       .     4_565   4_565 no
 C16     C13     C13     Rh3       -121.1(7)     .       .     4_565     .   no
 C16     C13     C13     C12        178.6(7)     .       .     4_565   4_565 no
 C16     C13     C13     C16         0.0(12)     .       .     4_565   4_565 no
 Rh2     C17     C18     C19         62.2(6)     .       .       .       .   no
 Rh2     C17     C18     C21       -120.4(7)     .       .       .       .   no
 C20     C17     C18     Rh2        123.4(7)     .       .       .       .   no
 C20     C17     C18     C19       -174.4(7)     .       .       .       .   no
 C20     C17     C18     C21         3.0(12)     .       .       .       .   no
 C17     C17     C18     Rh2        -62.6(5)   4_565     .       .       .   no
 C17     C17     C18     C19         -0.4(8)   4_565     .       .       .   no
 C17     C17     C18     C21        177.0(7)   4_565     .       .       .   no
 C18     C17     C17     Rh2         63.8(5)     .       .     4_565     .   no
 C18     C17     C17     C18          0.0(8)     .       .     4_565   4_565 no
 C18     C17     C17     C20       -174.2(7)     .       .     4_565   4_565 no
 C20     C17     C17     Rh2       -122.0(7)     .       .     4_565     .   no
 C20     C17     C17     C18        174.2(7)     .       .     4_565   4_565 no
 C20     C17     C17     C20         0.0(11)     .       .     4_565   4_565 no
 Rh2     C18     C19     C22       -134.9(9)     .       .       .       .   no
 Rh2     C18     C19     C18         62.0(6)     .       .       .     4_565 no
 C17     C18     C19     Rh2        -61.3(5)     .       .       .       .   no
 C17     C18     C19     C22        163.8(9)     .       .       .       .   no
 C17     C18     C19     C18          0.7(9)     .       .       .     4_565 no
 C21     C18     C19     Rh2        121.2(7)     .       .       .       .   no
 C21     C18     C19     C22       -13.7(13)     .       .       .       .   no
 C21     C18     C19     C18       -176.8(7)     .       .       .     4_565 no
 C50     C45     C46     C47         0.00(1)     .       .       .       .   no
 C51     C45     C46     C47       180.00(1)     .       .       .       .   no
 C46     C45     C50     C49         0.00(1)     .       .       .       .   no
 C51     C45     C50     C49       180.00(1)     .       .       .       .   no
 C45     C46     C47     C48         0.00(1)     .       .       .       .   no
 C46     C47     C48     C49         0.00(1)     .       .       .       .   no
 C47     C48     C49     C50         0.00(1)     .       .       .       .   no
 C48     C49     C50     C45         0.00(1)     .       .       .       .   no
 
loop_
_geom_contact_atom_site_label_1
_geom_contact_atom_site_label_2
_geom_contact_distance
_geom_contact_site_symmetry_1
_geom_contact_site_symmetry_2
_geom_contact_publ_flag
 Rh6     H43A         3.4842                     .     4_555                 no
 Rh6     H43B         3.4718                     .     4_555                 no
 S1      C3         3.526(5)                     .     4_565                 no
 S1      S2         2.974(3)                     .       .                   no
 S1      S3         3.122(2)                     .       .                   no
 S1      C3         3.526(6)                     .       .                   no
 S1      C8         3.689(7)                     .       .                   no
 S1      C17        3.447(7)                     .       .                   no
 S1      S3         3.122(2)                     .     4_565                 no
 S1      C8         3.689(7)                     .     4_565                 no
 S1      C17        3.447(7)                     .     4_565                 no
 S2      C10        3.517(7)                     .       .                   no
 S2      Rh3        3.498(2)                     .       .                   no
 S2      S1         2.974(3)                     .       .                   no
 S2      S3         3.439(2)                     .       .                   no
 S2      C4         3.533(5)                     .       .                   no
 S2      C5         3.369(5)                     .       .                   no
 S2      C4         3.533(5)                     .     4_565                 no
 S2      C5         3.369(5)                     .     4_565                 no
 S2      S3         3.439(2)                     .     4_565                 no
 S2      C10        3.517(7)                     .     4_565                 no
 S3      C18        3.592(7)                     .       .                   no
 S3      C16        3.609(7)                     .       .                   no
 S3      C7         3.667(7)                     .       .                   no
 S3      S1         3.122(2)                     .       .                   no
 S3      S2         3.439(2)                     .       .                   no
 S3      S4         3.473(3)                     .       .                   no
 S3      C1         3.450(6)                     .       .                   no
 S3      C2         3.444(6)                     .       .                   no
 S3      C6         3.665(8)                     .       .                   no
 S3      C12        3.626(8)                     .       .                   no
 S3      C13        3.456(7)                     .       .                   no
 S3      Rh1      4.0557(15)                     .     4_565                 no
 S3      S3       3.0089(19)                     .     4_565                 no
 S4      C11       3.138(10)                     .       .                   no
 S4      C14       3.220(16)                     .       .                   no
 S4      Rh1        3.531(2)                     .       .                   no
 S4      S3         3.473(3)                     .       .                   no
 S4      C12        3.629(8)                     .     4_565                 no
 S4      C12        3.629(8)                     .       .                   no
 S4      Rh1        3.531(2)                     .     4_565                 no
 S4      S3         3.473(3)                     .     4_565                 no
 S5      C23        3.695(7)                     .     4_555                 no
 S5      C33        3.521(7)                     .     4_555                 no
 S5      S6         3.127(3)                     .     4_555                 no
 S5      C32        3.680(9)                     .       .                   no
 S5      S10       3.793(15)                     .     4_555                 no
 S5      C33        3.521(7)                     .       .                   no
 S5      S7        2.899(11)                     .       .                   no
 S5      S9        3.085(16)                     .       .                   no
 S5      S6         3.127(3)                     .       .                   no
 S5      C23        3.695(7)                     .       .                   no
 S5      C27        3.527(6)                     .       .                   no
 S5      C27        3.527(6)                     .     4_555                 no
 S5      C32        3.680(9)                     .     4_555                 no
 S5      S10       3.793(15)                     .       .                   no
 S6      C25        3.560(7)                     .       .                   no
 S6      S8         3.551(4)                     .       .                   no
 S6      Rh4      4.0891(15)                     .     4_555                 no
 S6      S6       3.0434(19)                     .     4_555                 no
 S6      S7         3.510(9)                     .       .                   no
 S6      C26        3.497(6)                     .       .                   no
 S6      S5         3.127(3)                     .       .                   no
 S6      C37       3.667(10)                     .       .                   no
 S6      S9        2.972(12)                     .       .                   no
 S6      C34        3.540(8)                     .       .                   no
 S6      S11       3.514(15)                     .     4_555                 no
 S6      C39        3.537(8)                     .       .                   no
 S6      C40        3.624(7)                     .       .                   no
 S6      S10       3.537(13)                     .       .                   no
 S6      S10       2.638(14)                     .     4_555                 no
 S7      C29       3.396(11)                     .       .                   no
 S7      C24        3.288(7)                     .       .                   no
 S7      Rh6       3.416(10)                     .       .                   no
 S7      S5        2.899(11)                     .       .                   no
 S7      S6         3.510(9)                     .     4_555                 no
 S7      C29       3.396(11)                     .     4_555                 no
 S7      S6         3.510(9)                     .       .                   no
 S7      C23       3.450(10)                     .       .                   no
 S7      C24        3.288(7)                     .     4_555                 no
 S7      C23       3.450(10)                     .     4_555                 no
 S8      C40        3.511(8)                     .       .                   no
 S8      Rh4        3.470(4)                     .     4_555                 no
 S8      Rh4        3.470(4)                     .       .                   no
 S8      C40        3.511(8)                     .     4_555                 no
 S8      S6         3.551(4)                     .     4_555                 no
 S8      S6         3.551(4)                     .       .                   no
 S8      C41       2.961(15)                     .       .                   no
 S8      C44         3.03(2)                     .       .                   no
 S9      Rh5       3.977(15)                     .       .                   no
 S9      S6        2.972(12)                     .       .                   no
 S9      S5        3.085(16)                     .       .                   no
 S9      C24       3.624(10)                     .     4_555                 no
 S9      C24       3.624(10)                     .       .                   no
 S9      S6        2.972(12)                     .     4_555                 no
 S10     S5        3.793(15)                     .       .                   no
 S10     C30       3.643(15)                     .     4_555                 no
 S10     Rh4       3.537(13)                     .       .                   no
 S10     C24       3.314(15)                     .     4_555                 no
 S10     C40       3.470(16)                     .     4_555                 no
 S10     C25       3.410(14)                     .     4_555                 no
 S10     C29       3.406(17)                     .     4_555                 no
 S10     S6        2.638(14)                     .     4_555                 no
 S10     C41         3.41(2)                     .       .                   no
 S10     S6        3.537(13)                     .       .                   no
 S11     C24       2.852(17)                     .     4_555                 no
 S11     Rh6       3.279(15)                     .       .                   no
 S11     C29       2.672(18)                     .     4_555                 no
 S11     S6        3.514(15)                     .     4_555                 no
 S11     C25       3.423(17)                     .     4_555                 no
 S11     Rh4       3.398(16)                     .       .                   no
 S11     C23       3.512(18)                     .     4_555                 no
 S2      H10B         3.1387                     .     4_565                 no
 S2      H10B         3.1387                     .       .                   no
 S4      H14A         3.0112                     .       .                   no
 S4      H14B         3.0137                     .       .                   no
 S4      H14A         3.0112                     .       .                   no
 S4      H14B         3.0137                     .       .                   no
 S7      H29B         3.0178                     .       .                   no
 S7      H29B         3.0178                     .     4_555                 no
 S8      H51C         3.1845                     .     3_667                 no
 S8      H44A         2.8352                     .       .                   no
 S8      H44A         2.8352                     .       .                   no
 S8      H44B         2.8329                     .       .                   no
 S8      H44B         2.8329                     .       .                   no
 S8      H51C         3.1845                     .     2_647                 no
 S10     H29A         2.9241                     .     4_555                 no
 S10     H30B         3.1450                     .     4_555                 no
 S11     H29B         2.5019                     .     4_555                 no
 S11     H29A         2.3741                     .     4_555                 no
 C1      C3        2.321(10)                     .       .                   no
 C1      S3         3.450(6)                     .       .                   no
 C1      C42       3.355(12)                     .     1_565                 no
 C1      C10       2.606(10)                     .       .                   no
 C1      C4         2.324(8)                     .       .                   no
 C1      C7        2.623(10)                     .       .                   no
 C2      C42       3.599(12)                     .     1_565                 no
 C2      C8        2.615(10)                     .       .                   no
 C2      S3         3.444(6)                     .       .                   no
 C2      C5        2.329(10)                     .       .                   no
 C2      C6        2.645(11)                     .       .                   no
 C2      C4         2.318(9)                     .       .                   no
 C3      C7        2.625(10)                     .       .                   no
 C3      S1         3.526(6)                     .       .                   no
 C3      C1        2.321(10)                     .       .                   no
 C3      C9        2.633(10)                     .       .                   no
 C3      C5        2.329(10)                     .       .                   no
 C4      C8        2.604(11)                     .       .                   no
 C4      C1         2.324(8)                     .       .                   no
 C4      C10       2.638(11)                     .       .                   no
 C4      S2         3.533(5)                     .       .                   no
 C4      C2         2.318(9)                     .       .                   no
 C5      C9        2.631(10)                     .       .                   no
 C5      C3        2.329(10)                     .       .                   no
 C5      C6        2.638(10)                     .       .                   no
 C5      C2        2.329(10)                     .       .                   no
 C5      S2         3.369(5)                     .       .                   no
 C7      C16       3.559(11)                     .     3_576                 no
 C11     C15       2.611(10)                     .       .                   no
 C11     C38       3.542(15)                     .     3_666                 no
 C11     C38       3.542(15)                     .     2_656                 no
 C11     S4        3.138(10)                     .       .                   no
 C11     C13       2.284(12)                     .     4_565                 no
 C11     C15       2.611(10)                     .     4_565                 no
 C11     C13       2.284(12)                     .       .                   no
 C12     C16       2.588(12)                     .       .                   no
 C12     C12       2.335(10)                     .     4_565                 no
 C12     S3         3.626(8)                     .       .                   no
 C12     C14       2.612(14)                     .       .                   no
 C12     C13       2.296(10)                     .     4_565                 no
 C12     S4         3.629(8)                     .       .                   no
 C13     C11       2.284(12)                     .       .                   no
 C13     S3         3.456(7)                     .       .                   no
 C13     C12       2.296(10)                     .     4_565                 no
 C13     C15       2.609(13)                     .       .                   no
 C13     C16       2.605(11)                     .     4_565                 no
 C14     C18       3.400(14)                     .     1_655                 no
 C14     C17       3.443(16)                     .     4_665                 no
 C14     C18       3.400(14)                     .     4_665                 no
 C14     C17       3.443(16)                     .     1_655                 no
 C14     C19       3.388(16)                     .     1_655                 no
 C14     C19       3.388(16)                     .     4_665                 no
 C16     C7        3.559(11)                     .     3_576                 no
 C17     S1         3.447(7)                     .       .                   no
 C17     C20       2.633(11)                     .     4_565                 no
 C17     C21       2.617(11)                     .       .                   no
 C17     C19       2.319(12)                     .       .                   no
 C17     C14       3.443(16)                     .     4_465                 no
 C17     C18       2.315(10)                     .     4_565                 no
 C17     C14       3.443(16)                     .     1_455                 no
 C18     C14       3.400(14)                     .     1_455                 no
 C18     C20       2.616(10)                     .       .                   no
 C18     C22       2.610(13)                     .       .                   no
 C18     C18       2.307(10)                     .     4_565                 no
 C18     C17       2.315(10)                     .     4_565                 no
 C18     S3         3.592(7)                     .       .                   no
 C18     C14       3.400(14)                     .     4_465                 no
 C19     C21        2.607(9)                     .       .                   no
 C19     C17       2.319(12)                     .       .                   no
 C19     C14       3.388(16)                     .     4_465                 no
 C19     C21        2.607(9)                     .     4_565                 no
 C19     C17       2.319(12)                     .     4_565                 no
 C19     C14       3.388(16)                     .     1_455                 no
 C23     S11       3.512(18)                     .     4_555                 no
 C23     C25       2.299(10)                     .       .                   no
 C23     S5         3.695(7)                     .       .                   no
 C23     C32       2.578(12)                     .       .                   no
 C23     S7        3.450(10)                     .       .                   no
 C23     C26       2.293(10)                     .       .                   no
 C23     C29       2.653(15)                     .       .                   no
 C24     S10       3.314(15)                     .     4_555                 no
 C24     C30       2.612(13)                     .       .                   no
 C24     S9        3.624(10)                     .       .                   no
 C24     C28       2.644(13)                     .       .                   no
 C24     S7         3.288(7)                     .       .                   no
 C24     S11       2.852(17)                     .     4_555                 no
 C24     C27       2.309(10)                     .       .                   no
 C24     C26       2.305(10)                     .       .                   no
 C25     S11       3.423(17)                     .     4_555                 no
 C25     C29       2.615(12)                     .       .                   no
 C25     S6         3.560(7)                     .       .                   no
 C25     S10       3.410(14)                     .     4_555                 no
 C25     C23       2.299(10)                     .       .                   no
 C25     C31       2.622(12)                     .       .                   no
 C25     C27       2.280(10)                     .       .                   no
 C26     C32       2.610(11)                     .       .                   no
 C26     S6         3.497(6)                     .       .                   no
 C26     C30       2.597(12)                     .       .                   no
 C26     C24       2.305(10)                     .       .                   no
 C26     C23       2.293(10)                     .       .                   no
 C27     C24       2.309(10)                     .       .                   no
 C27     S5         3.527(6)                     .       .                   no
 C27     C28       2.616(12)                     .       .                   no
 C27     C25       2.280(10)                     .       .                   no
 C27     C31       2.596(11)                     .       .                   no
 C33     C34        2.289(9)                     .     4_555                 no
 C33     S5         3.521(7)                     .       .                   no
 C33     C37       2.615(12)                     .       .                   no
 C33     C35       2.308(12)                     .       .                   no
 C33     C36       2.611(11)                     .     4_555                 no
 C34     C36       2.624(13)                     .       .                   no
 C34     S6         3.540(8)                     .       .                   no
 C34     C33        2.289(9)                     .     4_555                 no
 C34     C34       2.266(10)                     .     4_555                 no
 C34     C38       2.614(14)                     .       .                   no
 C35     C33       2.308(12)                     .     4_555                 no
 C35     C37        2.614(9)                     .     4_555                 no
 C35     C33       2.308(12)                     .       .                   no
 C35     C37        2.614(9)                     .       .                   no
 C38     C11       3.542(15)                     .     2_646                 no
 C38     C11       3.542(15)                     .     3_666                 no
 C39     C40       2.260(11)                     .     4_555                 no
 C39     C43       2.537(14)                     .       .                   no
 C39     C42       2.581(14)                     .     4_555                 no
 C39     C41       2.300(17)                     .       .                   no
 C39     S6         3.537(8)                     .       .                   no
 C40     S8         3.511(8)                     .       .                   no
 C40     C44       2.598(19)                     .       .                   no
 C40     C42       2.591(14)                     .       .                   no
 C40     S6         3.624(7)                     .       .                   no
 C40     C40        2.314(7)                     .     4_555                 no
 C40     S10       3.470(16)                     .     4_555                 no
 C40     C39       2.260(11)                     .     4_555                 no
 C41     C43        2.691(9)                     .       .                   no
 C41     C39       2.300(17)                     .     4_555                 no
 C41     C43        2.691(9)                     .     4_555                 no
 C41     S8        2.961(15)                     .       .                   no
 C41     S10         3.41(2)                     .     4_555                 no
 C41     S10         3.41(2)                     .       .                   no
 C41     C39       2.300(17)                     .       .                   no
 C42     C2        3.599(12)                     .     1_545                 no
 C42     C1        3.355(12)                     .     1_545                 no
 C1      H42A         2.8448                     .     1_565                 no
 C2      H42C         3.0603                     .     1_565                 no
 C4      H43B         3.0582                     .     1_565                 no
 C5      H42A         2.8766                     .     1_565                 no
 C6      H7B          2.8430                     .       .                   no
 C6      H10A         2.8692                     .       .                   no
 C7      H6A          2.8676                     .       .                   no
 C7      H21B         3.0700                     .       .                   no
 C7      H8B          2.9774                     .       .                   no
 C8      H7A          2.9715                     .       .                   no
 C8      H9B          2.8564                     .       .                   no
 C9      H8A          2.8269                     .       .                   no
 C9      H10B         2.9419                     .       .                   no
 C10     H9A          2.9415                     .       .                   no
 C10     H6B          2.9045                     .       .                   no
 C11     H38C         2.5624                     .     2_656                 no
 C11     H38C         2.5624                     .     3_666                 no
 C12     H38C         2.8178                     .     2_656                 no
 C12     H38C         2.8178                     .     3_666                 no
 C13     H38C         3.0902                     .     3_666                 no
 C13     H38C         3.0902                     .     2_656                 no
 C14     H15A         2.8886                     .     4_565                 no
 C14     H15A         2.8886                     .       .                   no
 C15     H16B         2.8309                     .       .                   no
 C15     H14B         2.8758                     .       .                   no
 C15     H14B         2.8758                     .       .                   no
 C16     H37C         3.0874                     .     3_666                 no
 C16     H15B         2.8775                     .       .                   no
 C16     H22B         2.9410                     .       .                   no
 C16     H22A         2.9342                     .     4_565                 no
 C16     H7C          3.0711                     .     3_576                 no
 C16     H16A         2.9322                     .     4_565                 no
 C17     H14B         2.9175                     .     1_455                 no
 C17     H14A         2.9165                     .     4_465                 no
 C18     H14B         2.9587                     .     1_455                 no
 C18     H14A         2.9591                     .     4_465                 no
 C19     H14C         2.9027                     .     1_455                 no
 C19     H14C         2.9027                     .     4_465                 no
 C20     H8B          2.9796                     .       .                   no
 C20     H21B         2.9495                     .       .                   no
 C20     H20B         2.8589                     .     4_565                 no
 C21     H22A         2.8639                     .     4_565                 no
 C21     H20A         2.9619                     .       .                   no
 C21     H22B         2.8598                     .       .                   no
 C22     H16A         2.7308                     .       .                   no
 C22     H16A         2.7308                     .     4_565                 no
 C22     H14C         3.0455                     .     1_455                 no
 C22     H21A         2.8952                     .       .                   no
 C22     H14C         3.0455                     .     4_465                 no
 C22     H21A         2.8952                     .     4_565                 no
 C26     H28C         2.8908                     .     3_757                 no
 C27     H28C         2.7507                     .     3_757                 no
 C28     H32B         2.8141                     .       .                   no
 C28     H29B         2.9064                     .       .                   no
 C29     H28A         2.9168                     .       .                   no
 C29     H30B         2.9321                     .       .                   no
 C30     H29A         2.9437                     .       .                   no
 C30     H31B         2.8430                     .       .                   no
 C31     H30A         2.8359                     .       .                   no
 C31     H32A         2.9225                     .       .                   no
 C32     H31A         2.9047                     .       .                   no
 C32     H28B         2.8530                     .       .                   no
 C32     H28C         3.0708                     .     3_757                 no
 C32     H43C         2.9300                     .     1_655                 no
 C33     H16C         3.0822                     .     3_666                 no
 C34     H16C         2.8518                     .     3_666                 no
 C36     H37B         2.9354                     .       .                   no
 C36     H36B         2.7997                     .     4_555                 no
 C36     H32A         3.0083                     .       .                   no
 C37     H36A         2.9597                     .       .                   no
 C37     H16C         2.9915                     .     3_666                 no
 C37     H38A         2.8787                     .       .                   no
 C37     H38A         2.8787                     .       .                   no
 C38     H37A         2.8895                     .       .                   no
 C38     H37A         2.8895                     .     4_555                 no
 C38     H42B         2.7701                     .     4_555                 no
 C38     H42B         2.7701                     .       .                   no
 C42     H43B         2.5941                     .       .                   no
 C42     H38A         2.9311                     .       .                   no
 C42     H38A         2.9311                     .       .                   no
 C42     H6C          2.9933                     .     1_545                 no
 C42     H42B         3.0201                     .     4_555                 no
 C43     H44B         3.0568                     .       .                   no
 C43     H42A         2.5695                     .       .                   no
 C43     H44B         3.0568                     .       .                   no
 C43     H9C          3.0604                     .     1_545                 no
 C45     H51A         2.0643                     .     4_565                 no
 C45     H51B         2.0649                     .     4_565                 no
 C46     H10B         2.8920                     .     4_565                 no
 C46     H51B         2.7302                     .     4_565                 no
 C46     H51A         2.7285                     .     4_565                 no
 C46     H10B         2.8920                     .       .                   no
 C49     H31C         2.9737                     .     4_555                 no
 C49     H31C         2.9737                     .     1_565                 no
 H6A     H7B          2.2544                     .       .                   no
 H6A     H21C         2.4965                     .     3_576                 no
 H6A     C7           2.8676                     .       .                   no
 H6B     C10          2.9045                     .       .                   no
 H6B     H10A         2.3017                     .       .                   no
 H6C     C42          2.9933                     .     1_565                 no
 H7A     C8           2.9715                     .       .                   no
 H7A     H21B         2.4519                     .       .                   no
 H7A     H8B          2.4264                     .       .                   no
 H7A     H20A         2.4094                     .       .                   no
 H7B     H6A          2.2544                     .       .                   no
 H7B     C6           2.8430                     .       .                   no
 H7B     H21A         2.5620                     .     3_576                 no
 H7C     C16          3.0711                     .     3_576                 no
 H7C     H36C         2.3885                     .     1_465                 no
 H8A     H9B          2.2420                     .       .                   no
 H8A     C9           2.8269                     .       .                   no
 H8B     H7A          2.4264                     .       .                   no
 H8B     H20A         2.3986                     .       .                   no
 H8B     C20          2.9796                     .       .                   no
 H8B     C7           2.9774                     .       .                   no
 H8C     H36A         2.4679                     .     1_465                 no
 H9A     C10          2.9415                     .       .                   no
 H9A     H51B         2.5864                     .       .                   no
 H9A     H51A         2.5846                     .     4_565                 no
 H9A     H46          2.5310                     .       .                   no
 H9A     H46          2.5310                     .     4_565                 no
 H9A     H10B         2.3748                     .       .                   no
 H9B     C8           2.8564                     .       .                   no
 H9B     H8A          2.2420                     .       .                   no
 H9C     C43          3.0604                     .     1_565                 no
 H9C     H43B         2.5826                     .     1_565                 no
 H10A    H6B          2.3017                     .       .                   no
 H10A    C6           2.8692                     .       .                   no
 H10B    C9           2.9419                     .       .                   no
 H10B    C46          2.8920                     .       .                   no
 H10B    S2           3.1387                     .       .                   no
 H10B    H46          2.5282                     .       .                   no
 H10B    H9A          2.3748                     .       .                   no
 H10B    H46          2.5282                     .     4_565                 no
 H10B    C46          2.8920                     .     4_565                 no
 H10C    H31B         2.4486                     .     1_565                 no
 H14A    H15A         2.3065                     .     4_565                 no
 H14A    C18          2.9591                     .     4_665                 no
 H14A    C17          2.9165                     .     4_665                 no
 H14A    S4           3.0112                     .       .                   no
 H14A    C15          2.8776                     .     4_565                 no
 H14B    H15A         2.3049                     .       .                   no
 H14B    C18          2.9587                     .     1_655                 no
 H14B    C17          2.9175                     .     1_655                 no
 H14B    C15          2.8758                     .       .                   no
 H14B    S4           3.0137                     .       .                   no
 H14C    H22C         2.3697                     .     1_655                 no
 H14C    C19          2.9027                     .     1_655                 no
 H14C    C19          2.9027                     .     4_665                 no
 H14C    C22          3.0455                     .     1_655                 no
 H14C    C22          3.0455                     .     4_665                 no
 H14C    H22C         2.3697                     .     4_665                 no
 H15A    H14B         2.3049                     .       .                   no
 H15A    H14B         2.3049                     .       .                   no
 H15A    C14          2.8886                     .       .                   no
 H15B    C16          2.8775                     .       .                   no
 H15B    H16B         2.2684                     .       .                   no
 H16A    H22B         1.9864                     .       .                   no
 H16A    H22A         1.9789                     .     4_565                 no
 H16A    H16A         2.3755                     .     4_565                 no
 H16A    C16          2.9322                     .     4_565                 no
 H16A    C22          2.7308                     .       .                   no
 H16B    H15B         2.2684                     .       .                   no
 H16B    C15          2.8309                     .       .                   no
 H16C    C37          2.9915                     .     3_666                 no
 H16C    C33          3.0822                     .     3_666                 no
 H16C    H37C         2.3541                     .     3_666                 no
 H16C    C34          2.8518                     .     3_666                 no
 H20A    C21          2.9619                     .       .                   no
 H20A    H21B         2.4045                     .       .                   no
 H20A    H7A          2.4094                     .       .                   no
 H20A    H8B          2.3986                     .       .                   no
 H20B    H20B         2.2628                     .     4_565                 no
 H20B    C20          2.8589                     .     4_565                 no
 H21A    H7B          2.5620                     .     3_576                 no
 H21A    H22A         2.3204                     .     4_565                 no
 H21A    H22B         2.3173                     .       .                   no
 H21A    C22          2.8952                     .       .                   no
 H21B    C20          2.9495                     .       .                   no
 H21B    C7           3.0700                     .       .                   no
 H21B    H7A          2.4519                     .       .                   no
 H21B    H20A         2.4045                     .       .                   no
 H21C    H6A          2.4965                     .     3_576                 no
 H22A    C16          2.9342                     .     4_565                 no
 H22A    H21A         2.3204                     .     4_565                 no
 H22A    H16A         1.9789                     .     4_565                 no
 H22A    C21          2.8639                     .     4_565                 no
 H22B    H16A         1.9864                     .       .                   no
 H22B    C16          2.9410                     .       .                   no
 H22B    H21A         2.3173                     .       .                   no
 H22B    C21          2.8598                     .       .                   no
 H22C    H14C         2.3697                     .     4_465                 no
 H22C    H14C         2.3697                     .     1_455                 no
 H28A    H29B         2.3247                     .       .                   no
 H28A    C29          2.9168                     .       .                   no
 H28B    C32          2.8530                     .       .                   no
 H28B    H32B         2.2381                     .       .                   no
 H28C    C27          2.7507                     .     3_757                 no
 H28C    C26          2.8908                     .     3_757                 no
 H28C    C32          3.0708                     .     3_757                 no
 H28C    H32C         2.5078                     .     3_757                 no
 H29A    C30          2.9437                     .       .                   no
 H29A    S11          2.3741                     .     4_555                 no
 H29A    S10          2.9241                     .     4_555                 no
 H29A    H30B         2.3747                     .       .                   no
 H29B    S7           3.0178                     .       .                   no
 H29B    C28          2.9064                     .       .                   no
 H29B    S11          2.5019                     .     4_555                 no
 H29B    H28A         2.3247                     .       .                   no
 H29C    H32C         2.4869                     .     3_757                 no
 H29C    H43A         2.5733                     .     3_657                 no
 H30A    H31B         2.2426                     .       .                   no
 H30A    C31          2.8359                     .       .                   no
 H30B    C29          2.9321                     .       .                   no
 H30B    H29A         2.3747                     .       .                   no
 H30B    S10          3.1451                     .     4_555                 no
 H30C    H51B         2.5664                     .     1_545                 no
 H30C    H51A         2.5708                     .     4_555                 no
 H31A    H32A         2.3495                     .       .                   no
 H31A    H37B         2.5421                     .       .                   no
 H31A    C32          2.9047                     .       .                   no
 H31B    H10C         2.4486                     .     1_545                 no
 H31B    C30          2.8430                     .       .                   no
 H31B    H30A         2.2426                     .       .                   no
 H31C    C49          2.9737                     .     4_555                 no
 H31C    C49          2.9737                     .     1_545                 no
 H32A    H36A         2.3667                     .       .                   no
 H32A    C31          2.9225                     .       .                   no
 H32A    C36          3.0083                     .       .                   no
 H32A    H31A         2.3495                     .       .                   no
 H32A    H43C         2.5070                     .     1_655                 no
 H32B    H44C         2.5631                     .     4_655                 no
 H32B    C28          2.8141                     .       .                   no
 H32B    H28B         2.2381                     .       .                   no
 H32B    H44C         2.5631                     .     1_655                 no
 H32C    H29C         2.4869                     .     3_757                 no
 H32C    H28C         2.5078                     .     3_757                 no
 H36A    C37          2.9597                     .       .                   no
 H36A    H8C          2.4679                     .     1_645                 no
 H36A    H32A         2.3667                     .       .                   no
 H36A    H37B         2.3854                     .       .                   no
 H36B    H36B         2.1878                     .     4_555                 no
 H36B    C36          2.7997                     .     4_555                 no
 H36C    H7C          2.3885                     .     1_645                 no
 H37A    C38          2.8895                     .       .                   no
 H37A    H38A         2.3063                     .       .                   no
 H37A    H38A         2.3063                     .       .                   no
 H37B    H36A         2.3854                     .       .                   no
 H37B    C36          2.9354                     .       .                   no
 H37B    H31A         2.5421                     .       .                   no
 H37C    H16C         2.3541                     .     3_666                 no
 H37C    C16          3.0874                     .     3_666                 no
 H38A    H37A         2.3063                     .       .                   no
 H38A    C42          2.9311                     .       .                   no
 H38A    C37          2.8787                     .       .                   no
 H38A    H42B         1.9614                     .       .                   no
 H38B    C42          2.9311                     .     4_555                 no
 H38B    C37          2.8787                     .     4_555                 no
 H38B    H37A         2.3063                     .     4_555                 no
 H38B    H42B         1.9614                     .     4_555                 no
 H38C    C12          2.8178                     .     2_646                 no
 H38C    C11          2.5624                     .     2_646                 no
 H38C    C13          3.0902                     .     2_646                 no
 H38C    C11          2.5624                     .     3_666                 no
 H38C    C12          2.8178                     .     3_666                 no
 H38C    C13          3.0902                     .     3_666                 no
 H42A    C43          2.5695                     .       .                   no
 H42A    H43B         1.9172                     .       .                   no
 H42A    C5           2.8766                     .     1_545                 no
 H42A    C1           2.8448                     .     1_545                 no
 H42B    H38A         1.9614                     .       .                   no
 H42B    C42          3.0201                     .     4_555                 no
 H42B    C38          2.7701                     .       .                   no
 H42B    H42B         2.5120                     .     4_555                 no
 H42B    H38A         1.9614                     .       .                   no
 H42C    C2           3.0603                     .     1_545                 no
 H43A    H44B         2.5929                     .       .                   no
 H43A    H29C         2.5733                     .     3_657                 no
 H43A    H44B         2.5929                     .       .                   no
 H43B    C4           3.0582                     .     1_545                 no
 H43B    H42A         1.9172                     .       .                   no
 H43B    H9C          2.5826                     .     1_545                 no
 H43B    C42          2.5941                     .       .                   no
 H43C    C32          2.9300                     .     1_455                 no
 H43C    H32A         2.5070                     .     1_455                 no
 H44A    S8           2.8352                     .       .                   no
 H44A    C43          3.0542                     .     4_555                 no
 H44A    H43A         2.5908                     .     4_555                 no
 H44B    C43          3.0568                     .       .                   no
 H44B    S8           2.8329                     .       .                   no
 H44B    H43A         2.5929                     .       .                   no
 H44C    H32B         2.5631                     .     4_455                 no
 H44C    H32B         2.5631                     .     1_455                 no
 H46     H9A          2.5310                     .       .                   no
 H46     H10B         2.5282                     .       .                   no
 H46     H9A          2.5310                     .     4_565                 no
 H46     H10B         2.5282                     .     4_565                 no
 H50     H51C         2.4220                     .       .                   no
 H51A    H9A          2.5846                     .     4_565                 no
 H51A    H30C         2.5708                     .     4_555                 no
 H51B    H9A          2.5864                     .       .                   no
 H51B    H30C         2.5664                     .     1_565                 no
 H51C    H50          2.4220                     .       .                   no
 H51C    H51A         1.6004                     .     4_565                 no
 H51C    H51B         1.5995                     .     4_565                 no
 
#===END
